# Supplementary material for: Using Household Surveys to Assess Missed Opportunities for Simultaneous Vaccination: Longitudinal Examples from Colombia and Nigeria
Source: MDPI journal article supplement (doi:10.3390/vaccines9070795), 2021-07-16
Supplement: s1 [file s1]

## Supplementary Materials

### Using Household Surveys to Assess Missed Opportunities for Simultaneous Vaccination: Longitudinal Examples from Colombia and Nigeria

Dale A. Rhoda<sup>1\*</sup>, Mary L. Prier<sup>1</sup>, Caitlin B. Clary<sup>1</sup>, Mary Kay Trimner<sup>1</sup>, Martha Velandia-Gonzalez<sup>2</sup>,  
M. Carolina Danovaro-Holliday<sup>3</sup>, Felicity T. Cutts<sup>4</sup>

#### Table of Contents

|                                                                 |    |
|-----------------------------------------------------------------|----|
| Incidence of Vaccine Preventable Diseases .....                 | 3  |
| Provenance of the VCQI MOSV Indicators .....                    | 4  |
| Graphical Examination of Missed Opportunities .....             | 5  |
| MOSV Data Quality Complications .....                           | 13 |
| MOSV Calculation Complications.....                             | 13 |
| Vaccination Schedules for MOSV Analyses.....                    | 15 |
| References .....                                                | 16 |
| Additional Details to Supplement Figures in the Manuscript..... | 17 |

## List of Tables and Figures

|                                                                                                                                     |    |
|-------------------------------------------------------------------------------------------------------------------------------------|----|
| Figure SVPD.1. Incidence rates for vaccine preventable diseases for Colombia & Nigeria, 1980-2020 .....                             | 3  |
| Figure S.1. Vaccination Evidence and MOSV Indicators – Respondent 2 – had MOSVs for Penta2 and Penta3.....                          | 6  |
| Text Box S.1. Features of an “Evidence and Indicators Plot” .....                                                                   | 7  |
| Text Box S.2. Vaccination experience for children in Figures S.1, S.2, and S.3a-b.....                                              | 8  |
| Figure S.2. Vaccination Evidence and MOSV Indicators - Respondent 3 – had MOSVs for Penta1 .....                                    | 9  |
| Figure S.3a. Vaccination Evidence and MOSV Indicators - Respondent 4 – VCQI crude dose analysis where early doses count .....       | 10 |
| Figure S.3b. Vaccination Evidence and MOSV Indicators - Respondent 4 – VCQI valid dose analysis where early doses do not count..... | 11 |
| Figure S.4. Time to Correction Figure – Interpretation Guide .....                                                                  | 12 |
| Text Box S.4. Features of a Time to Correction Plot .....                                                                           | 12 |
| Table SC.1. Vaccination schedule for doses in Colombia MOSV analysis .....                                                          | 15 |
| Table SN.1. Vaccination schedule for doses in Nigeria MOSV analysis .....                                                           | 15 |
| Map SC.1. Map of Colombia Showing Region Names.....                                                                                 | 17 |
| Table SN.2a. Visit-based MOSV analysis – Nigeria – BCG and OPV1-3 .....                                                             | 18 |
| Table SN.2b. Visit-based MOSV analysis – Nigeria – DPT1-3 and MCV1 and any dose .....                                               | 19 |
| Table SN.2c. Visit-based MOSV analysis – Nigeria – Any Dose, MOSVs per visit & Visits between MOSVs .....                           | 20 |
| Table SC.2a. Visit-based MOSV analysis – Colombia – BCG and OPV1-3.....                                                             | 21 |
| Table SC.2b. Visit-based MOSV analysis – Colombia – DPT1-3 and MCV1 .....                                                           | 22 |
| Table SC.2c. Visit-based MOSV analysis – Colombia – Any dose, MOSVs per visit & Visits between MOSVs .....                          | 23 |
| Table SN.3a. Child-based MOSV analysis – Nigeria – National Results.....                                                            | 25 |
| Figure SN.3. Child-based MOSV analysis – Nigeria – Subnational Detail.....                                                          | 26 |
| Table SN.3b. Child-based MOSV analysis – Nigeria – Subnational Detail .....                                                         | 27 |
| Table SC.3a. Child-based MOSV analysis – Colombia – National Results .....                                                          | 28 |
| Figure SC.3. Child-based MOSV analysis – Colombia - Subnational Detail .....                                                        | 29 |
| Table SC.3b. Child-based MOSV analysis – Colombia - Subnational Detail .....                                                        | 30 |
| Table SN.4. MOSV Consequences – Nigeria – Potential Coverage Increase – National Results.....                                       | 31 |
| Table SC.4. MOSV Consequences – Colombia – Potential Coverage Increase – National Results .....                                     | 32 |
| Table SN.5a. MOSV Consequences – Nigeria – Time to Correction – National Results.....                                               | 33 |
| Table SN.5b. MOSV Consequences – Nigeria – Time to Correction – Subnational Detail .....                                            | 34 |
| Table SC.5a. MOSV Consequences – Colombia – Potential Coverage Increase – National Results .....                                    | 35 |
| Table SC.5b. MOSV Consequences – Colombia – Potential Coverage Increase – Subnational Detail .....                                  | 36 |

## INCIDENCE OF VACCINE PREVENTABLE DISEASES

Figure SVPD.1. Incidence rates for vaccine preventable diseases for Colombia & Nigeria, 1980-2020 [1]

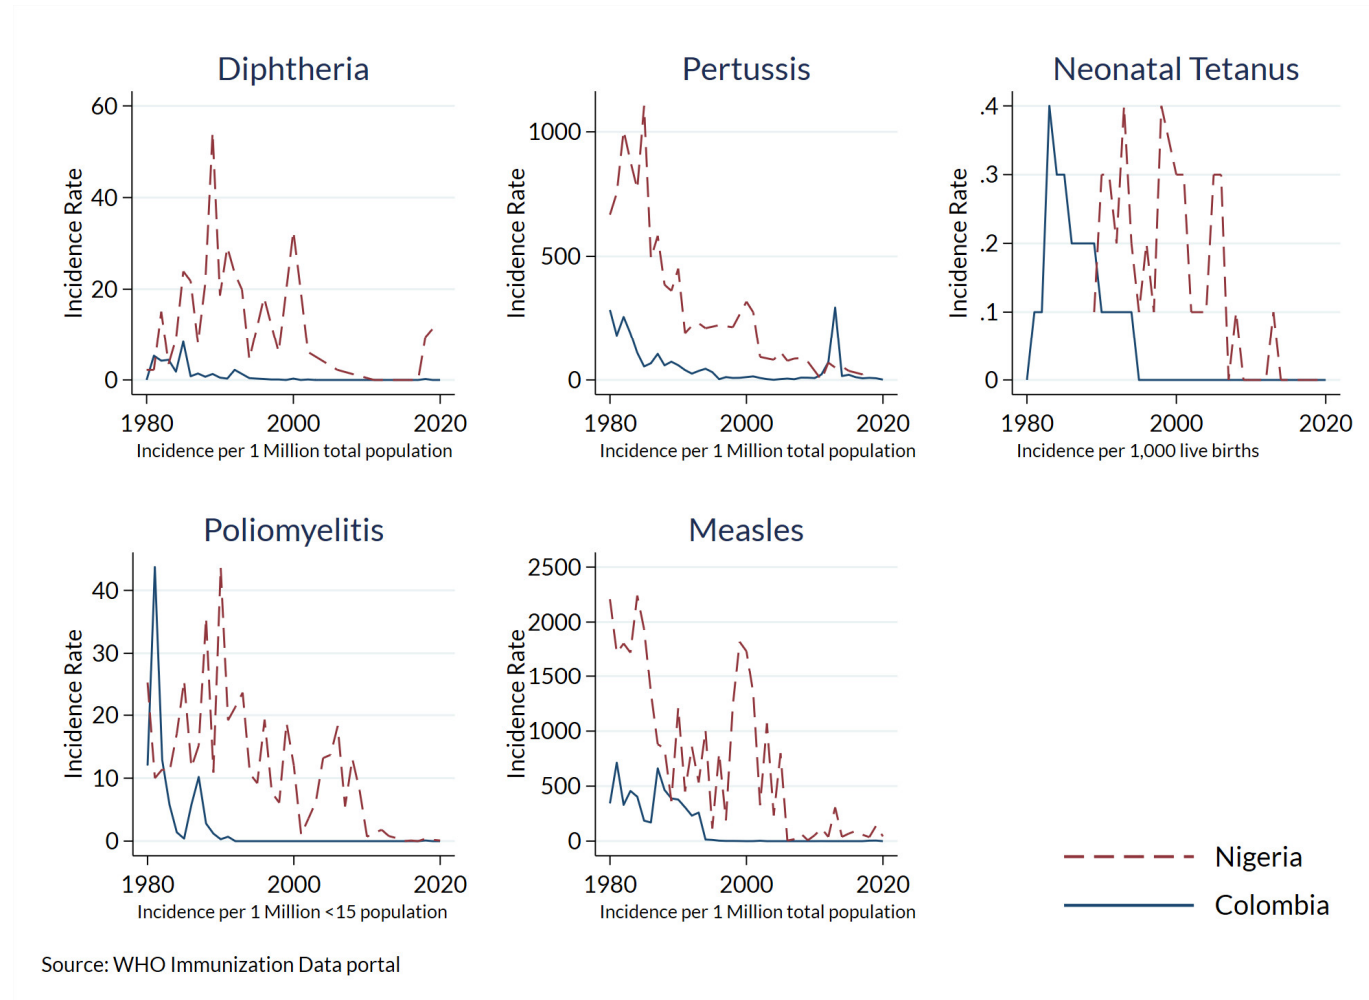

## PROVENANCE OF THE VCQI MOSV INDICATORS

MOV studies in the 1980s focused almost exclusively on a protocol for clinic-based visits. Caregivers with children are intercepted as they exit a health clinic and asked whether their child was vaccinated during the visit. Vaccination dates are copied from the child's home-based record (HBR or card) or from their facility-based record (FBR) and analyzed to determine whether they experienced MOVs at the clinic visit. Protocols for this type of study were developed at World Health Organization (WHO) headquarters in Geneva [2] and refined over the years at the Pan-American Health Organization (PAHO) [3,4] and again at WHO Geneva [5,6]. In clinic-based studies, even in recent years, the common analysis plan uses the child's vaccination dates from the card only to assess eligibility on a single day: the day of the clinic visit [7–9].

In the mid 1980s, the concept of analyzing whether all needed vaccines were administered during health service contacts was extended by one of us (FTC) to household surveys in Mozambique and subsequently Guinea Conakry – in the latter, caretakers were also asked about visits to health services for curative care [10]. In addition to estimating the prevalence of MOVs at preventive (Mozambique) and curative visits (Conakry and later also Central African Republic), survey authors estimated a “consequence indicator” of how much higher vaccination coverage would be if all the children in the study had received every eligible dose at every vaccination or growth monitoring visit and, in Conakry and CAR, at curative care [10,11]. Mothers' experience in being turned away from vaccination services (with reasons) and attitudes to vaccinating ill children were also assessed. While many of the early analyses were presumably conducted without using computers, later analyses of eligibility at every visit date used SAS programs written at the U.S. Centers for Disease Control. The programming was complex, as evidenced in archived source code from 1990/91 and documented with a comment early in the file:

```
|FUNCTION OF PROGRAM: DETERMINE MISSED OPPORTUNITIES FOR VACCINATION|  
|                               DRIVE EVERYONE COMPLETELY NUTS                               |1
```

The programming remains complex today. The VCQI modules that calculate MOV outcomes are some of the most complex of its 300+ Stata programs.

In the late 1980s, WHO sponsored development of DOS-based software named Coverage Survey Analysis System (COSAS)<sup>2</sup> and by 1991 COSAS documented and included indicators that assessed frequency of MOVs per clinic visit and per child, and consequence of MOVs at all of the child's documented vaccination dates [12,13]. COSAS was beloved by many immunization program staff<sup>3</sup> and reportedly used to analyze many surveys per year [14]. But the software was not upgraded over time and was rarely cited after the early 1990s. WHO's 2005 coverage survey reference manual and 2007 mid-level manager's training on coverage surveys give broad guidance for analyzing coverage survey data but do not describe analysis of MOSVs or any analysis using COSAS [15,16].

After COSAS there was an extended period from the mid-1990s to 2015 when WHO and PAHO had protocols for clinic based MOV studies, but there were no standardized guidance or tools for MOSV analyses using coverage survey data. This period corresponds precisely to that covered in the 2014 MOV literature review [17]. There were some interesting and reasonable analyses of MOVs using dates from coverage surveys and vaccination records review in that timeframe, but they did not employ standardized indicator definitions or analysis programs.

---

<sup>1</sup> From the author's (FTC) archive of project files.

<sup>2</sup> Personal communication with Eric Brenner, September 12, 2020.

<sup>3</sup> Personal communication with Pierre Claquin, Iqbal Hossain, Robert Steinglass & Alasdair Wylie.

In 2015 three of us (MLP & FTC & DAR) revisited definitions when we<sup>4</sup> authored the MOV sections of the working draft of WHO’s updated vaccination coverage cluster survey reference manual (which was finalized in 2018) [18,19]. Note that the WHO manual uses the term MOV and in this manuscript we introduce the more specific phrase MOSV. That manual recommends using all the vaccination dates on each child’s record to assess the frequency of MOSVs with (a) the child and (b) the health facility visit as denominators, as well as the consequence of MOSVs. In a companion effort, WHO commissioned a list of standard indicators that may be calculated with coverage survey data [20]. WHO selected a set of indicators to be developed more fully into software specifications and implemented in Stata programs. We call the list of indicators and the programs that calculate them, the Vaccination Coverage Quality Indicators (VCQI) [21].

## GRAPHICAL EXAMINATION OF MISSED OPPORTUNITIES

Figure S.1 is useful to describe VCQI’s indicator calculations. We use this type of figure to debug and validate VCQI indicator code, and these figures can be helpful for explaining and discussing MOVs with health workers. We formally call them “vaccination evidence and indicator plots” and informally “elbow plots”. Text Box S.1 lists important features of the elbow plot. In principle, the plot shows the vaccination evidence from HBR and caregiver recall (and sometimes from a document such as a register at a health facility, if this is included in the household survey) and annotations to show the values of variables that are derived from the evidence. The annotations appear in the right margin and sometimes on the plot itself. There are many indicators in VCQI so to minimize clutter in this supplement, for each child we repeat the evidence across several plots and annotate each with only a subset of variables and indicators. Figure 1 is what we call a ‘Crude MOV’ plot – a phrase that is described more fully below. Text Box S.2 narrates the vaccination experience of the children in Figures S.1 through S.3a-b.

Figure S.1 shows a basic WHO Expanded Programme on Immunization (EPI) vaccine schedule with 8 vaccine-doses: BCG at birth; oral polio vaccine (OPV) and pentavalent vaccine (Penta) at 6, 10 and 14 weeks, and measles vaccine at 9 months.

We have developed a publicly-available R Shiny application for exploring child-level MOSV results in VCQI datasets, available at [https://biostat-global-consulting.shinyapps.io/MOV\\_Tool\\_Public/](https://biostat-global-consulting.shinyapps.io/MOV_Tool_Public/). The application summarizes, for each dose in each stratum, the portions of children who received the dose at the first eligible opportunity, who had a corrected MOSV for the dose, and who had an uncorrected MOSV for the dose. The application also shows stratum-level summaries of the portion of children who experienced no MOSVs for any dose, and the portions who had MOSVs, all, some, or none of which were corrected by the time of the survey. For the subset of children who had corrected MOSVs, the delay between the initial missed opportunity and the visit when the dose was received is summarized in time to correction figures for each dose in each stratum.

Figures 3 and 4 in the manuscript were generated from the MOV Occurrence tab of the Shiny application, and Figures 6 and 7 in the manuscript were generated from the Time to Correction tab of the application. Figure S.4 and Text Box S.4 provide additional detail on interpreting the time to correction plots.

A series of videos orienting users to the R Shiny application is available on YouTube:

1. Introduction: <https://youtu.be/GQ7Hcmh2czs>
2. Exploring MOVs: <https://youtu.be/oyyBJ-NzNug>
3. Time to Correction: <https://youtu.be/TS0ePSsbZRk>
4. Data Requirements: <https://youtu.be/gppzvsmKoVU>

---

<sup>4</sup> Along with Dr. Pierre Claquin, WHO Consultant and Tony Burton, WHO Staff

Figure S.1. Vaccination Evidence and MOSV Indicators – Respondent 2 – had MOSVs for Penta2 and Penta3

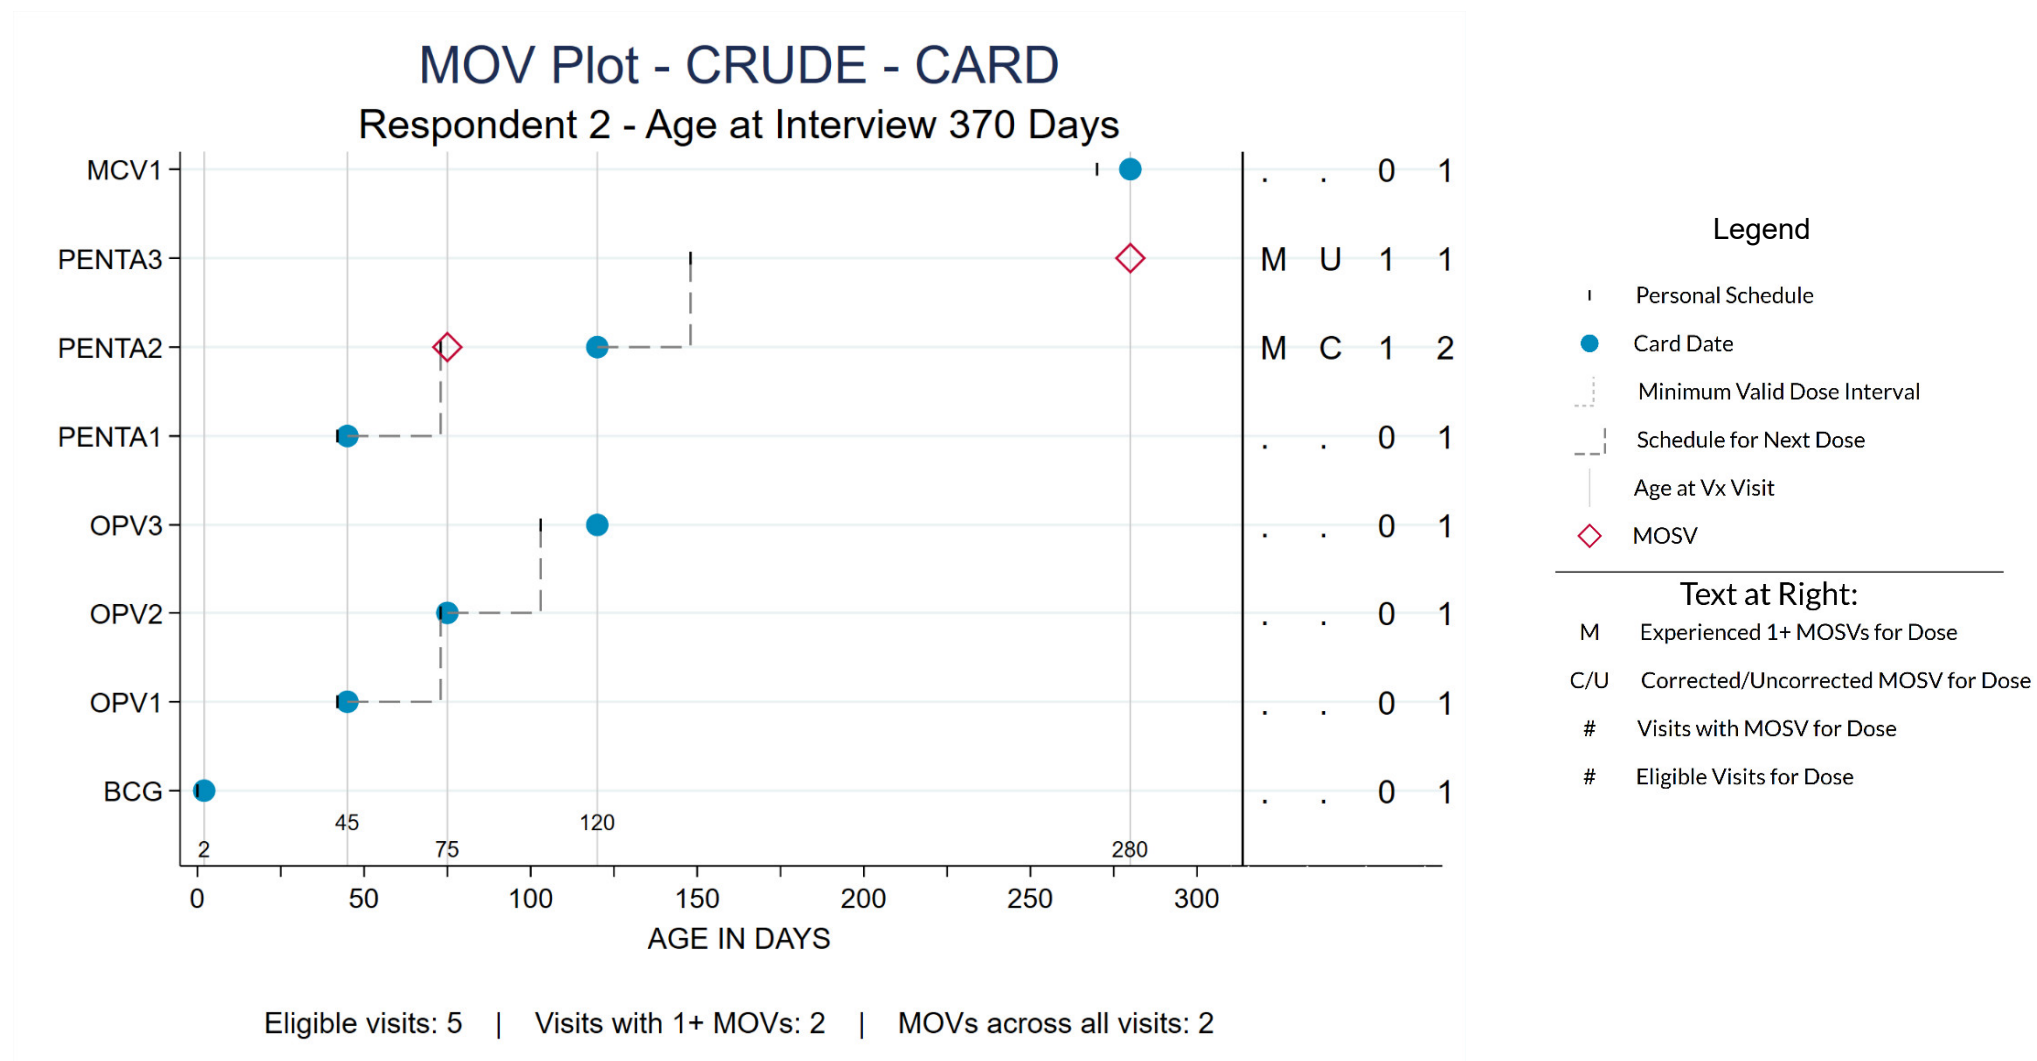

### Text Box S.1. Features of an “Evidence and Indicators Plot”

- The child’s age in days is shown on the x-axis and each vaccine-dose in the national schedule is represented with its own row.
- Doses that are scheduled to be given at birth appear at the bottom of the figure and those that are scheduled later appear near the top.
- Each series of multi-dose vaccines, like the 3-dose series of oral polio vaccine (OPV1-3) or pentavalent vaccine (Penta1-3) appear in adjacent rows.
- The age when the child becomes eligible to receive each dose is indicated with a small vertical bar (|) within the row.
- The age of eligibility for later doses in a series begin after a minimum interval has passed from the date when the earlier dose was received. These minimum intervals are indicated with right-angle connectors (*elbows*) that connect the date when the earlier dose was received to the date when the child becomes eligible for the next dose. These intra-dose minimum intervals are usually 4 weeks.
- Each health care contact visit is indicated with a tall vertical line that extends from the bottom to the top of the figure and lists the child’s age in days near the bottom.
- For each vaccine-dose documented with a date on the HBR, the chart shows a colored dot at the intersection of the vertical visit line and the dose row.
- If the evidence of vaccination is from a tick mark on the HBR or from caregiver recall, the entire row is colored, because we do not know at what age the child received the dose.
- A child is eligible to receive the vaccine-dose at any age to the right of the vertical bar (|).
- If a health system visit occurs at an age when the child is eligible and if they do not receive the dose at that visit, we say that an MOSV has occurred, and we draw a red diamond around the intersection of the visit line and the dose row.
- In these figures, the text at the far right lists the values of several derived variables.
  - If the child experienced an MOSV for the dose, the first column holds the letter “M”.
  - If the MOSV was later corrected, meaning that the child received the dose, but not at the first eligible visit, the second column holds the letter “C”.
  - If the MOSV was uncorrected, i.e. the child had still not received the dose at the time the data were collected, the second column holds the letter “U”.
  - The third column holds the number of contact visits at which the child experienced an MOSV for the dose.
  - The fourth column holds the number of contact visits when the child was eligible to receive the dose.

**Text Box S.2. Vaccination experience for children in Figures S.1, S.2, and S.3a-b**

The girl represented in Figure S.1 was 370 days old at the time of the survey.

- She received BCG at age 2 days.
- She received OPV1 and Penta1 at age 45 days meaning that she would be eligible for OPV2 and Penta2 from age  $45+28 = 73$  days.
- She received OPV2 but not Penta2 at age 75 days, so experienced an MOSV for Penta2 at that visit. She would be eligible for OPV3 at  $75+28 = 103$  days.
- She received OPV3 and Penta2 at age 120 days and would become eligible for Penta3 at  $120+28 = 148$  days.
- She received MCV at age 280 days, experiencing an MOSV for Penta3 at that visit.
- She was age 370 days at the time of the survey.
- This girl experienced two MOSVs, one for Penta2 and one for Penta3.
- The time to correction for the Penta2 MOSV was  $120-75 = 45$  days.
- At the time of the survey, the Penta3 MOSV was uncorrected, and she was  $370-148 = 222$  days overdue for that dose.
- If this child had not experienced any MOSVs, she would have been fully vaccinated at the age of 280 days.

The boy in Figure S.2 was 400 days old at the time of the survey.

- Received BCG, OPV-1-3, and MCV exactly on time.
- Did not receive Penta at all.
- Experienced MOSVs for Penta1 at age 42, 70, 98, and 270 days.
- The MOSVs are all uncorrected.
- If there had been no MOSVs, he would have also received Penta1-3 and been fully vaccinated at age 270 days.

The boy in Figures S.3a and S.3b was 388 days old at the time of the survey.

- He received BCG at birth and Penta1 at age 28 days, which is two weeks before the scheduled age of 42 days.
- He received OPV1 at 42 days and received all other doses exactly on schedule at 70, 98, and 270 days.
- Figure S.3a shows the crude dose analysis. The early dose of Penta is counted as dose 1 in the series and he is not credited with any MOSVs.
- Figure S.3b shows the valid dose analysis. The dose at 28 days is ignored because it was too early. On day 42, the child is credited with an MOSV for Penta at the time he received OPV1. That MOSV is corrected when the dose of Penta at day 70 is counted as dose 1, the dose of Penta on day 98 is counted as dose 2, and he is credited with an uncorrected Penta 3 MOSV at age 270 days when he receives only measles vaccine.



Figure S.2. Vaccination Evidence and MOSV Indicators - Respondent 3 – had MOSVs for Penta1

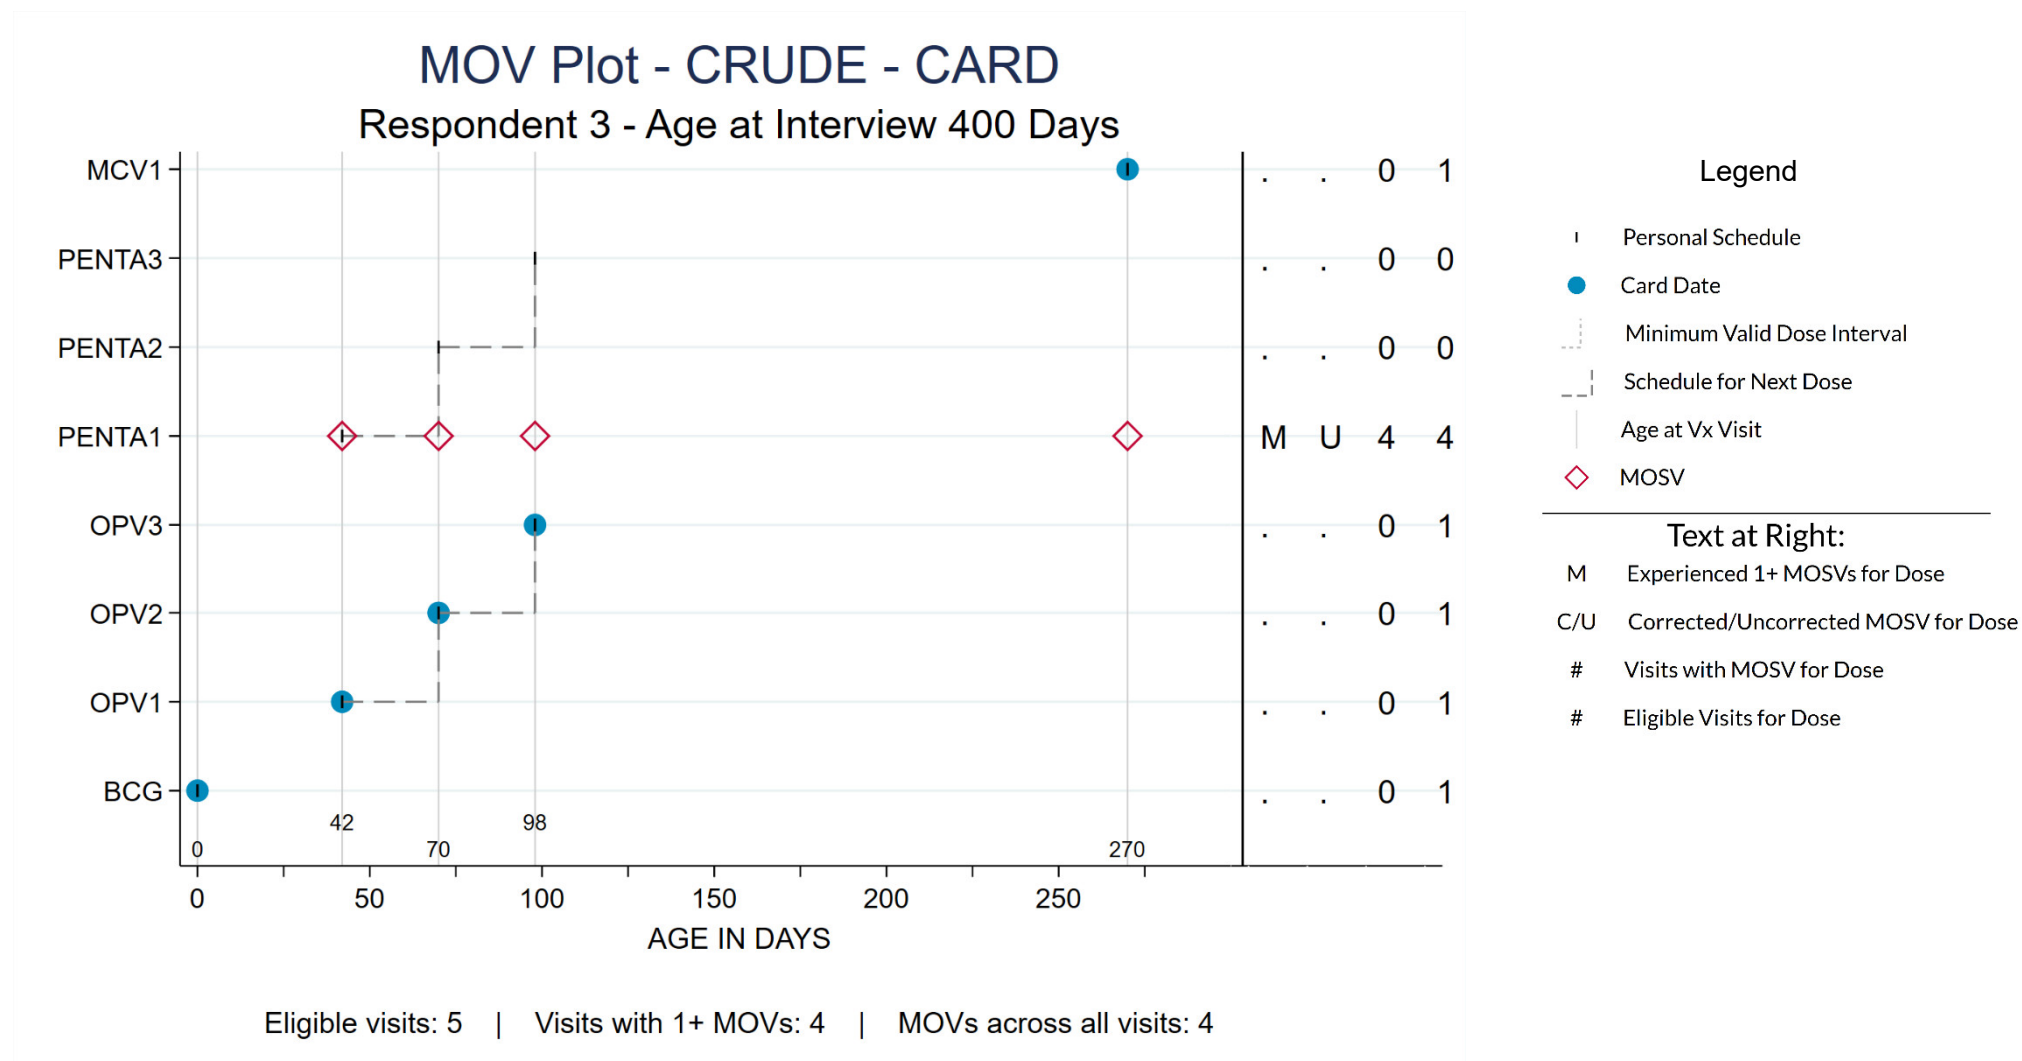

Figure S.3a. Vaccination Evidence and MOSV Indicators - Respondent 4 – VCQI crude dose analysis where early doses count

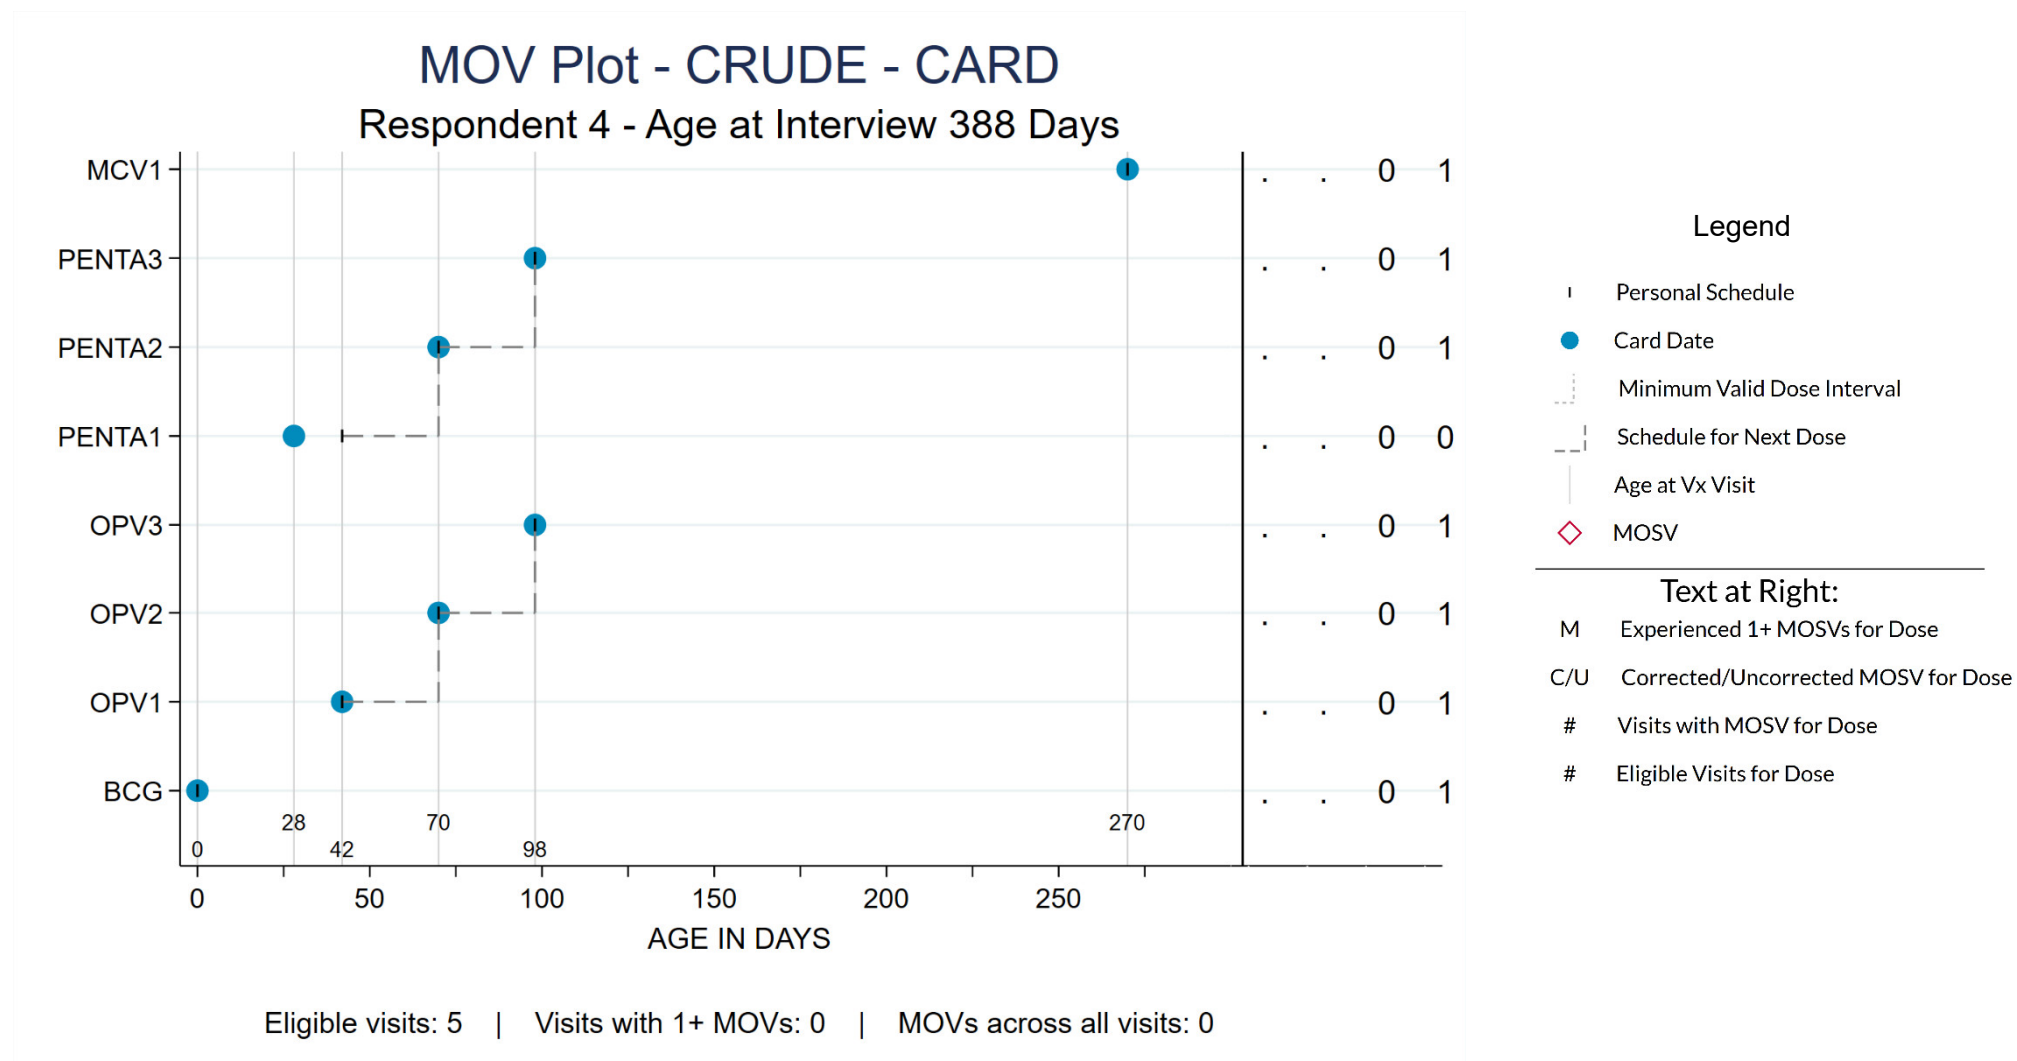

Figure S.3b. Vaccination Evidence and MOSV Indicators - Respondent 4 – VCQI valid dose analysis where early doses do not count

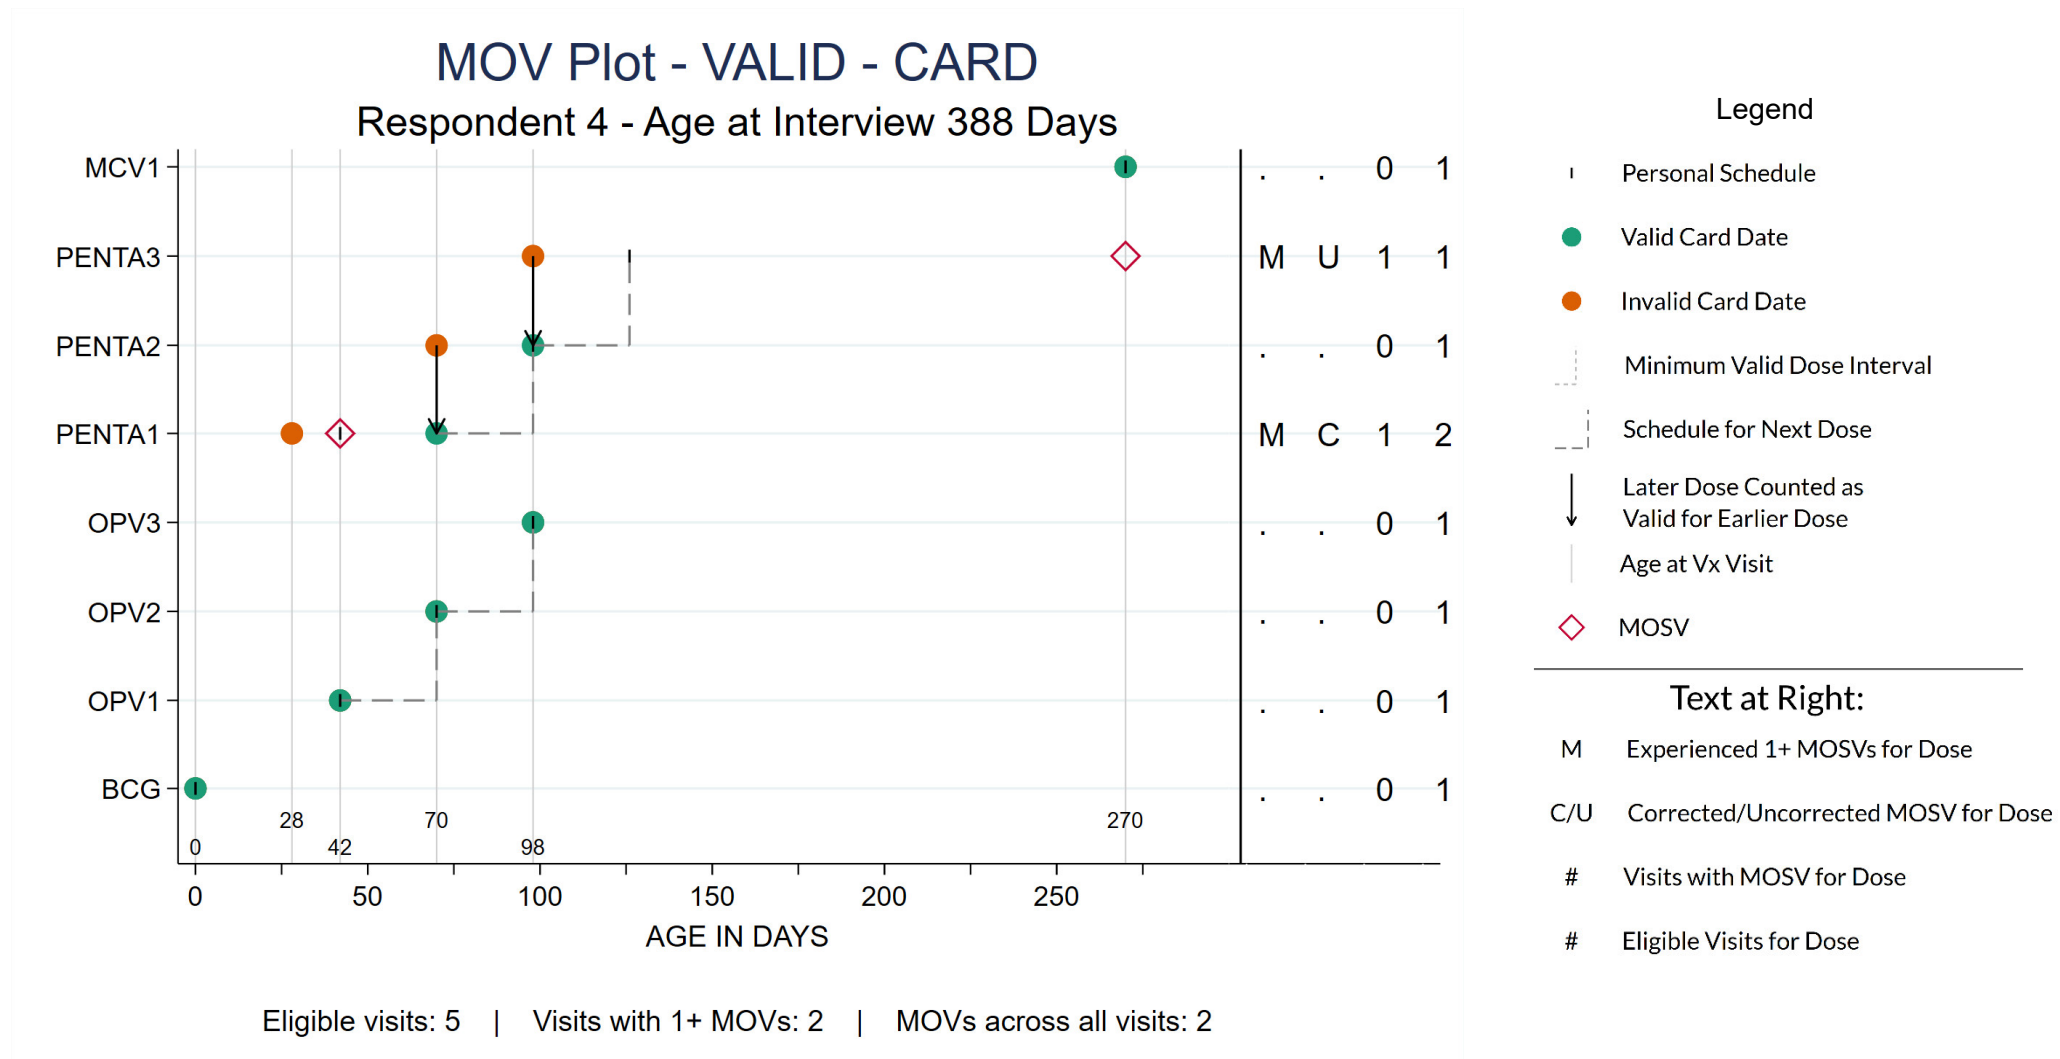

**Figure S.4. Time to Correction Figure – Interpretation Guide**

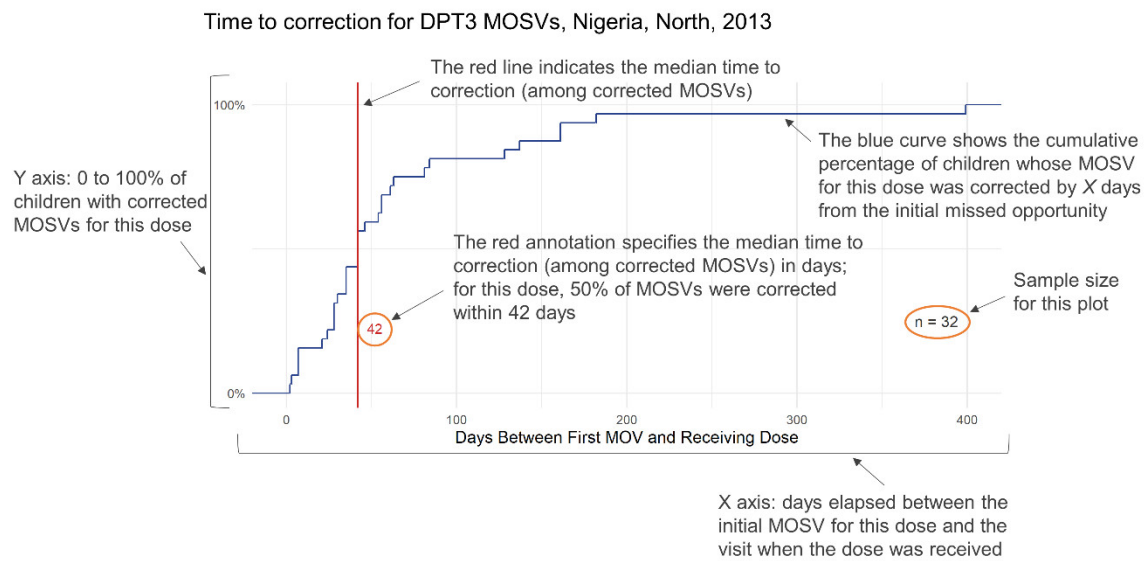

**Text Box S.4. Features of a Time to Correction Plot**

The time to correction figures in the manuscript show cumulative distributions of days until MOSV correction by stratum and dose. Figure S.4 is an annotated example of a single coverage curve figure, showing time to correction outcomes for children in a single stratum (the North zone of Nigeria) who had a corrected MOSV for a particular dose (DPT3). As time goes on, more children have their MOSVs corrected, until eventually 100% of the MOSVs that were corrected by the time of the survey have been corrected.

The blue curves in time to correction plots show the cumulative percentage of children whose MOSV was corrected by the number of days that have passed since the earliest opportunity to receive the dose. The red line and red annotation indicate the median time to correction in days. Sample size ( $n$ ) is annotated in the bottom right of the plot.

MOSVs that were not corrected by the time of the survey are not represented in these plots because time to correction for those missed opportunities is not observed.

## MOSV DATA QUALITY COMPLICATIONS

It is conceptually straightforward (though requiring complex programming) to identify MOSVs (or all MOVs if dates of other types of health contacts are available) and tally which were corrected, which were uncorrected, and to calculate the number of days the child spent under-protected because of their MOVs. But there are several practical issues that usually prevent the analyst from generalizing MOV results to the entire population.

Children without documented dates: In most household surveys in LMICs a notable portion of children do not show HBRs to interviewers so their MOVs cannot be assessed using the methods described here. This portion of children does not appear in the VCQI denominator for visit-based or child-based MOSV analyses and they never contribute to the numerator for children who would have received a valid dose if there had been no MOSVs.

Children with poor-quality documentation: There can be errors of omission and of commission for every element of the documented vaccination record: dates can be correct, incorrect, partial, illegible, missing, or written in the wrong spot on the HBR or FBR. Furthermore, the HBR can have different errors than the FBR, resulting in discordant evidence. Some doses that were not administered according to the documented evidence will be confidently vouched for by the caregiver (maybe she knows that she mistakenly left the HBR at home on the day of the most recent clinic visit).

Date data quality problems will have various consequences for MOV indicators. If evidence is from an unusable date or tick mark or from caregiver recall, then the dose cannot be assessed for MOVs. The analyst (and software) have no way of knowing at what visit or age the child received that dose. They also have no way of knowing whether the child experienced MOVs at the visit when they received the date-deficient dose. This removes some doses or entire visits from indicator denominators. If the date is complete but wrong, it can look like a legitimate visit that never occurred and it can add spurious observations to the denominator and the numerators. The errant dates appear in the analysis as visit dates and the software mistakenly counts some MOVs that never happened. Some errant dates will contribute to numerators and denominators (if the child would have been eligible for doses on the incorrect date) and some will be more benign if they fall in a time period when the child would not be eligible for any doses.

## MOSV CALCULATION COMPLICATIONS

VCQI is flexible and can accommodate differences in country vaccination schedule, type of survey sampling, whether the analysis should use survey weights and different combinations of vaccination evidence. No matter which combination is appropriate, VCQI analyzes the MOVs using the same programs, which are responsive to different input parameters.

That flexibility comes at the cost of the software being complex. Although VCQI is comprised of more than 300 Stata programs (.ado files), the user only interacts with one program, called the *control program* where they specify parameters to describe the vaccination schedule, the survey parameters, and which indicators to calculate. The vaccination schedule is specified with up to three parameters per dose: minimum age to receive a valid dose; optionally, a maximum age when the dose is valid; and for doses in a series, the minimum intra-dose interval.

There are two aspects of MOV calculation that require special flexibility.

Long intra-dose schedule versus minimum interval for valid doses: In countries where childhood diseases are prevalent, vaccination visits are usually scheduled four weeks apart so children can reach full protection as early as possible. In countries where disease is less prevalent, the vaccination visits

are sometimes spaced out farther. In Latin American countries, the OPV/Penta1-3 visits are scheduled eight weeks apart. A later dose is valid any time after four weeks have lapsed but the child is not scheduled to come back for eight weeks. This presents a computational challenge in evaluating eligibility. VCQI addresses this challenge using two parameters: the scheduled age for each dose, and the minimum interval required for the later dose to be considered valid.

Doses administered too early: Consider the child whose history is portrayed in Figure S.3a. The card says they received Penta1 at age 28 days when it was scheduled at 42 days. They receive Penta2 and 3 on time at 70 and 98 days. Dose 1 was invalid. What should the healthcare worker do when the child returns for MCV at age 270 days? Administer a fourth dose of Penta, which would be the child's third *valid* dose? If yes, where would they write that date on the HBR? The spaces for Penta1, 2 and 3 are already filled. What are the chances that the worker will even notice that the dose was early? And now to the point for MOVs, should VCQI count an MOV if the worker fails to administer the third valid dose along with MCV at age 270 days?

VCQI calculates MOSV outcomes two ways and then tabulates and graphs the set of outcomes that the user requests. The so-called *crude analysis* counts early doses and valid doses alike. If there is evidence on the HBR that they received the dose, then the clinic worker is not expected to repeat invalid doses at later visits, and VCQI does not count an MOSV if they fail to do so. Figure S.3a shows results of the crude analysis; VCQI did not count an MOSV for Penta3 at 270 days. In the more strict, so-called *valid analysis*, early doses do not count, and VCQI counts an MOSV if the child returns later but does not receive the full complement of valid doses. Figure S.3b shows results of the valid analysis for the same child, where VCQI finds an MOSV for Penta3. The valid analysis yields more MOSVs than the crude analysis. The crude analysis probably corresponds to the practice in many countries: If the dose appears on the card, it is not repeated – even if it was early. The valid analysis is more concerned with maximizing the number of valid doses and thereby maximizing the likelihood the child will develop immunity. When we run VCQI, it is our practice to examine the crude outcome first. If the crude MOSV numbers are concerning, there is no need to consult the valid analysis. If the crude analysis is not concerning, then it may be worthwhile to also examine results of the valid analysis.

In our opinion, the topic of crude versus valid analysis warrants more exploration. It would be helpful to have clear guidance from WHO and for countries to turn extant guidance [22,23] into clear national policies concerning whether health workers should repeat doses that were given too early, and if so, under what circumstances. In the early 2010s many countries only gave first-year-of-life (1YL) doses to children who were still in the first year of life. In recent years, some second year of life (2YL) doses have been introduced into the schedule and countries are encouraged to catch-up for doses that were missed in infancy. It would be feasible to recommend catching up for doses given too early, but there are practical concerns, such as how those repeated doses would be recorded on the HBR. At this time in LMICs the appropriate first MOSV analysis is the more conservative crude analysis because it is likely consistent with their vaccination practices and because if it shows a notable prevalence of MOSVs then stakeholder engagement is warranted for reducing MOSVs. If the crude analysis outcomes are acceptably low then one might look at the valid analysis, but the results will only differ if there are a lot of early doses, which should already have been observed when looking at other timeliness indicators that we have not detailed here.

## VACCINATION SCHEDULES FOR MOSV ANALYSES

Tables SC.1 and SN.1 list the ages at which the MOSV analysis doses were scheduled in Colombia and Nigeria for the years of the surveys. Other doses in the datasets were scheduled for these same ages, but only the schedules of the analysis doses are relevant for the MOSV results.

**Table SC.1. Vaccination schedule for doses in Colombia MOSV analysis**

| Age      | Doses Analyzed for MOSVs |
|----------|--------------------------|
| Birth    | BCG                      |
| 2 months | OPV1, DPT1               |
| 4 months | OPV2, DPT2               |
| 6 months | OPV3 DPT3                |
| 1 year   | MCV                      |

**Table SN.1. Vaccination schedule for doses in Nigeria MOSV analysis**

| Age      | Doses Analyzed for MOSVs |
|----------|--------------------------|
| Birth    | BCG                      |
| 6 weeks  | OPV1, DPT1               |
| 10 weeks | OPV2, DPT2               |
| 14 weeks | OPV3 DPT3                |
| 9 months | MCV                      |

## REFERENCES

1. World Health Organization WHO Vaccine Preventable Disease Incidence Data. Available online: <https://whowiise.blob.core.windows.net/upload/incidence-rate.xlsx> (accessed on 5 July 2021).
2. WHO EPI Study of Immunization Status and Reasons for Postponing Immunizations: Protocol 1984.
3. Pan American Health Organization Methodology for the Evaluation of Missed Opportunities for Vaccination 2013.
4. Rosenbaum, J. Revised Protocol for the Assessment of Missed Opportunities for Vaccination 1988.
5. Sato, P. Protocol for the Assessment of Missed Opportunities for Immunization 1988.
6. World Health Organization *Methodology for the Assessment of Missed Opportunities for Vaccination*; World Health Organization: Geneva, Switzerland, 2017; ISBN 978-92-4-151295-4.
7. Li, A.J.; Tabu, C.; Shendale, S.; Seron, K.; Okoth, P.O.; Mugoya, I.K.; Macheekanyanga, Z.; Onuekwusi, I.U.; Sanderson, C.; Ogbuanu, I.U. Assessment of Missed Opportunities for Vaccination in Kenyan Health Facilities, 2016. *PLOS ONE* 2020, 17.
8. Li, A.J.; Peiris, T.S.R.; Sanderson, C.; Nic Lochlainn, L.; Mausiry, M.; da Silva, R.B.J.B.M.; Ogbuanu, I.U. Opportunities to Improve Vaccination Coverage in a Country with a Fledgling Health System: Findings from an Assessment of Missed Opportunities for Vaccination among Health Center Attendees—Timor Leste, 2016. *Vaccine* 2019, 37, 4281–4290, doi:10.1016/j.vaccine.2019.06.041.
9. Ogbuanu, I.U.; Li, A.J.; Anya, B.M.; Tamadji, M.; Chirwa, G.; Chiwaya, K.W.; Djalal, M.E.-H.; Cheikh, D.; Macheekanyanga, Z.; Okeibunor, J.; et al. Can Vaccination Coverage Be Improved by Reducing Missed Opportunities for Vaccination? Findings from Assessments in Chad and Malawi Using the New WHO Methodology. *PLoS ONE* 2019, 14, e0210648, doi:10.1371/journal.pone.0210648.
10. Cutts, F.T.; Zell, E.; Soares, A.C.; Diallo, S. Obstacles to Achieving Immunization for All 2000: Missed Immunization Opportunities and Inappropriately Timed Immunization. *Journal of Tropical Pediatrics* 1991, 37, 153–158.
11. Kahn, J.G.; Mokdad, A.H.; Deming, M.S. Avoiding Missed Opportunities for Immunization in the Central African Republic: Potential Impact on Vaccination Coverage. 1995, 73, 9.
12. Desvé, G.; Havreng, J.-F.; Brenner, E. Coverage Survey Analysis System (COSAS) 4.3 - Software for EPI 30 Cluster Coverage Surveys 1991.
13. Grabowsky, M. *Missed Opportunities for Immunization*; Resources for Child Health Project: Arlington, VA, 1991.
14. Hutchins, S.S.; Jansen, H.A.F.M.; Robertson, S.E. Missed Opportunities for Immunization - Review of Studies from Developing and Industrialized Countries 1992.
15. WHO Training for Mid-Level Managers: The EPI Coverage Survey 2007.
16. World Health Organization *Immunization Coverage Cluster Survey: Reference Manual*; World Health Organization: Geneva, Switzerland, 2005.
17. Sridhar, S.; Maleq, N.; Guillermet, E.; Colombini, A.; Gessner, B.D. A Systematic Literature Review of Missed Opportunities for Immunization in Low- and Middle-Income Countries. *Vaccine* 2014, 32, 6870–6879, doi:10.1016/j.vaccine.2014.10.063.
18. World Health Organization. Vaccination Coverage Cluster Surveys: Reference Manual; (No. WHO/IVB/18.09). World Health Organization: Geneva, Switzerland, 2018.  
<https://apps.who.int/iris/handle/10665/272820>. License: CC BY-NC-SA 3.0 IGO
19. World Health Organization Vaccination Coverage Cluster Surveys: Reference Manual - Working Draft 2015.
20. Rhoda, D.A. *VCQI Indicator List with Specifications, Draft Version 2.2*; Biostat Global Consulting, 2021.
21. Biostat Global Consulting Vaccination Coverage Quality Indicators (VCQI). Resources available online: [http://www.biostatglobal.com/VCQI\\_resources.html](http://www.biostatglobal.com/VCQI_resources.html).
22. World Health Organization Summary of WHO Position Papers - Recommendations for Routine Immunization. Available online: [http://www.who.int/immunization/policy/Immunization\\_routine\\_table1.pdf](http://www.who.int/immunization/policy/Immunization_routine_table1.pdf) (accessed on 31 May 2021).
23. World Health Organization Summary of WHO Position Papers - Recommended Routine Immunizations for Children. Available online: [http://www.who.int/immunization/policy/Immunization\\_routine\\_table2.pdf](http://www.who.int/immunization/policy/Immunization_routine_table2.pdf) (accessed on 31 May 2021).



## ADDITIONAL DETAILS TO SUPPLEMENT FIGURES IN THE MANUSCRIPT

**Map SC.1. Map of Colombia Showing Region Names**

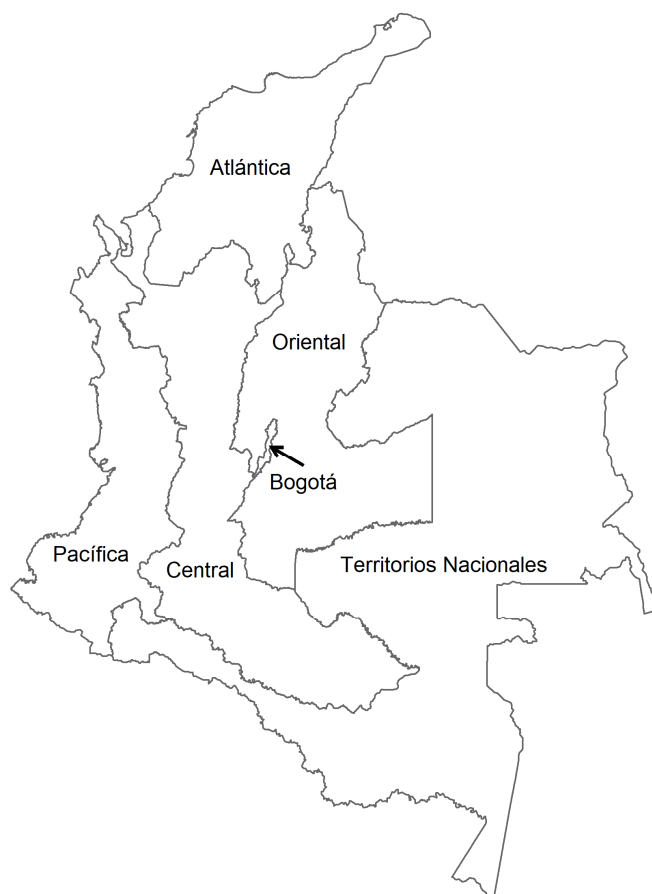

**Table SN.2a. Visit-based MOSV analysis – Nigeria – BCG and OPV1-3**

| Year  | Stratum | Visits with<br>MOSV for BCG<br>(%)                                                        | N     | Visits with<br>MOSV for OPV1<br>(%)                                                       | N     | Visits with<br>MOSV for OPV2<br>(%)                                                         | N     | Visits with<br>MOSV for OPV3<br>(%)                                                         | N     |
|-------|---------|-------------------------------------------------------------------------------------------|-------|-------------------------------------------------------------------------------------------|-------|---------------------------------------------------------------------------------------------|-------|---------------------------------------------------------------------------------------------|-------|
| 1990  | Nigeria |  5.4     | 441   |  16.0    | 438   |  1.0     | 300   |  3.6     | 253   |
| 1999  | Nigeria |  16.5    | 236   |  47.4    | 268   |  5.9     | 135   |  22.2    | 117   |
| 2003  | Nigeria |  13.5    | 244   |  46.4    | 233   |  7.1     | 112   |  18.6    | 97    |
| 2008  | Nigeria |  35.3    | 1,548 |  37.7    | 1,219 |  12.9    | 774   |  10.0    | 647   |
| 2013  | Nigeria |  26.7    | 2,068 |  34.7    | 1,750 |  12.0    | 1,237 |  12.6    | 1,102 |
| 2018  | Nigeria |  24.2    | 2,774 |  13.9    | 1,668 |  4.1     | 1,403 |  4.7     | 1,373 |
| 1990  | North   |  8.7     | 172   |  13.1    | 153   |  3.2     | 93    |  5.6     | 71    |
| 1999  | North   |  31.7    | 41    |  51.3    | 39    |  .0      | 18    |  38.5    | 13    |
| 2003  | North   |  12.6    | 127   |  56.3    | 135   |  9.1     | 44    |  23.7    | 38    |
| 2008  | North   |  49.6    | 714   |  44.3    | 503   |  23.5    | 302   |  16.1    | 230   |
| 2013  | North   |  33.8    | 904   |  38.5    | 736   |  12.4    | 469   |  17.1    | 391   |
| 2018  | North   |  27.9    | 1,644 |  17.8    | 987   |  6.3     | 766   |  5.1     | 707   |
| 1990  | South   |  3.3     | 269   |  17.5    | 285   |  .0      | 207   |  2.7     | 182   |
| 1999  | South   |  14.1    | 142   |  46.2    | 173   |  8.8     | 91    |  25.3    | 79    |
| 2003  | South   |  14.5   | 117   |  32.7   | 98    |  5.9    | 68    |  15.3   | 59    |
| 2008  | South   |  23.1  | 834   |  33.0  | 716   |  6.1   | 472   |  6.7   | 417   |
| 2013  | South   |  21.1  | 1,164 |  32.1  | 1,014 |  11.8  | 768   |  10.1  | 711   |
| 2018  | South   |  18.8  | 1,130 |  8.2   | 681   |  1.4   | 637   |  4.4   | 666   |
| Scale |         |  100.0 |       |  100.0 |       |  100.0 |       |  100.0 |       |

Notes for this table appear after Table SN.2c

**Table SN.2b. Visit-based MOSV analysis – Nigeria – DPT1-3 and MCV1 and any dose**

| Year  | Stratum | Visits with<br>MOSV for DPT1<br>(%)                                                       | N     | Visits with<br>MOSV for DPT2<br>(%)                                                       | N     | Visits with<br>MOSV for DPT3<br>(%)                                                         | N     | Visits with<br>MOSV for<br>MCV1 (%)                                                         | N     | Visits with<br>MOSV for any<br>dose (%)                                                     | N     |
|-------|---------|-------------------------------------------------------------------------------------------|-------|-------------------------------------------------------------------------------------------|-------|---------------------------------------------------------------------------------------------|-------|---------------------------------------------------------------------------------------------|-------|---------------------------------------------------------------------------------------------|-------|
| 1990  | Nigeria |  17.7    | 440   |  1.0    | 301   |  2.8     | 250   |  25.6    | 324   |  14.1    | 1,351 |
| 1999  | Nigeria |  50.5    | 277   |  7.8    | 129   |  16.2    | 105   |  28.2    | 149   |  38.5    | 732   |
| 2003  | Nigeria |  42.0    | 238   |  5.8    | 120   |  15.4    | 104   |  32.3    | 124   |  33.3    | 655   |
| 2008  | Nigeria |  29.2    | 1,267 |  6.6    | 828   |  6.8     | 766   |  27.0    | 937   |  32.7    | 4,222 |
| 2013  | Nigeria |  36.2    | 1,963 |  14.1   | 1,332 |  12.6    | 1,164 |  24.3    | 1,253 |  29.8    | 6,599 |
| 2018  | Nigeria |  15.4    | 1,711 |  3.1    | 1,424 |  3.9     | 1,384 |  23.3    | 1,350 |  16.9    | 7,690 |
|       |         |                                                                                           |       |                                                                                           |       |                                                                                             |       |                                                                                             |       |                                                                                             |       |
| 1990  | North   |  17.5    | 154   |  1.1    | 91    |  4.3     | 70    |  33.1    | 139   |  21.0    | 424   |
| 1999  | North   |  25.7    | 35    |  8.0    | 25    |  40.0    | 20    |  48.4    | 31    |  46.8    | 111   |
| 2003  | North   |  42.2    | 128   |  7.5    | 53    |  16.7    | 48    |  44.8    | 67    |  41.8    | 318   |
| 2008  | North   |  34.6    | 534   |  10.7   | 317   |  8.8     | 284   |  31.3    | 386   |  45.2    | 1,650 |
| 2013  | North   |  36.1    | 795   |  15.7   | 508   |  16.2    | 421   |  31.9    | 518   |  35.6    | 2,528 |
| 2018  | North   |  19.8    | 1,019 |  4.5    | 771   |  5.2     | 718   |  32.2    | 733   |  22.0    | 4,155 |
|       |         |                                                                                           |       |                                                                                           |       |                                                                                             |       |                                                                                             |       |                                                                                             |       |
| 1990  | South   |  17.8    | 286   |  1.0    | 210   |  2.2     | 180   |  20.0    | 185   |  10.9    | 927   |
| 1999  | South   |  54.5    | 178   |  7.6    | 79    |  14.3    | 63    |  20.9    | 91    |  37.5    | 472   |
| 2003  | South   |  41.8   | 110   |  4.5   | 67    |  14.3   | 56    |  17.5   | 57    |  25.2   | 337   |
| 2008  | South   |  25.2  | 733   |  4.1  | 511   |  5.6   | 482   |  24.0  | 551   |  24.7  | 2,572 |
| 2013  | South   |  36.3  | 1,168 |  13.1 | 824   |  10.6  | 743   |  19.0  | 735   |  26.2  | 4,071 |
| 2018  | South   |  9.0   | 692   |  1.4  | 653   |  2.6   | 666   |  12.8  | 617   |  10.9  | 3,535 |
|       |         |                                                                                           |       |                                                                                           |       |                                                                                             |       |                                                                                             |       |                                                                                             |       |
| Scale |         |  100.0 |       |  100.0 |       |  100.0 |       |  100.0 |       |  100.0 |       |

Notes for this table appear after Table SN.2c

**Table SN.2c. Visit-based MOSV analysis – Nigeria – Any Dose, MOSVs per visit & Visits between MOSVs**

| Year  | Stratum | MOSVs<br>per Visit | N     | Visits<br>between<br>MOSVs |
|-------|---------|--------------------|-------|----------------------------|
| 1990  | Nigeria | 0.205              | 1,351 | 4.9                        |
| 1999  | Nigeria | 0.559              | 732   | 1.8                        |
| 2003  | Nigeria | 0.504              | 655   | 2.0                        |
| 2008  | Nigeria | 0.450              | 4,222 | 2.2                        |
| 2013  | Nigeria | 0.424              | 6,599 | 2.4                        |
| 2018  | Nigeria | 0.221              | 7,690 | 4.5                        |
| 1990  | North   | 0.281              | 424   | 3.6                        |
| 1999  | North   | 0.649              | 111   | 1.5                        |
| 2003  | North   | 0.632              | 318   | 1.6                        |
| 2008  | North   | 0.636              | 1,650 | 1.6                        |
| 2013  | North   | 0.520              | 2,528 | 1.9                        |
| 2018  | North   | 0.296              | 4,155 | 3.4                        |
| 1990  | South   | 0.170              | 927   | 5.9                        |
| 1999  | South   | 0.549              | 472   | 1.8                        |
| 2003  | South   | 0.383              | 337   | 2.6                        |
| 2008  | South   | 0.331              | 2,572 | 3.0                        |
| 2013  | South   | 0.365              | 4,071 | 2.7                        |
| 2018  | South   | 0.134              | 3,535 | 7.5                        |
| Scale |         | 1.000              |       | 10                         |

| Notes                                                                                                                                                                                                                                                                                   |
|-----------------------------------------------------------------------------------------------------------------------------------------------------------------------------------------------------------------------------------------------------------------------------------------|
| Percent of visits where children were eligible for the dose and did not receive it.                                                                                                                                                                                                     |
| This is a crude dose analysis, meaning that early doses are accepted and counted in this analysis.                                                                                                                                                                                      |
| The final two measures on this sheet, MOSVs per visit and Visits between MOSVs are NOT percentages.                                                                                                                                                                                     |
| These analyses are unweighted.                                                                                                                                                                                                                                                          |
| The 1999 survey included a stratum named 'Central' which is included in the rows labeled 'Nigeria' but is excluded from the North vs. South comparison.                                                                                                                                 |
| Blue columns labeled (%) are shaded such that 100% would fill the entire table cell.                                                                                                                                                                                                    |
| The orange column labeled 'MOSVs per visit' are shaded such that 1.0 would fill the entire cell.                                                                                                                                                                                        |
| The pink column labeled 'Visits between MOSVs' is shaded such that 10.0 would fill the entire table cell. It can be interpreted as showing e.g. that an MOSV occurred on average once in every 3 visits for the South in 2008, compared to once in every 8 visits in the South in 2018. |

**Table SC.2a. Visit-based MOSV analysis – Colombia – BCG and OPV1-3**

| Year  | Stratum                | Visits with MOSV for BCG (%)                                                              | N     | Visits with MOSV for OPV1 (%)                                                             | N     | Visits with MOSV for OPV2 (%)                                                              | N     | Visits with MOSV for OPV3 (%)                                                               | N     |
|-------|------------------------|-------------------------------------------------------------------------------------------|-------|-------------------------------------------------------------------------------------------|-------|--------------------------------------------------------------------------------------------|-------|---------------------------------------------------------------------------------------------|-------|
| 1995  | Colombia               |  29.5    | 786   |  7.9     | 534   |  6.3     | 378   |  7.8     | 322   |
| 2000  |                        |  43.4    | 1,104 |  20.6    | 762   |  18.3    | 613   |  22.5    | 564   |
| 2005  |                        |  20.9    | 2,628 |  28.7    | 2,617 |  5.3     | 1,657 |  8.3     | 1,518 |
| 2010  |                        |  10.3    | 2,957 |  10.5    | 2,782 |  2.1     | 2,482 |  4.4     | 2,356 |
| 1995  | Atlántica              |  42.4    | 243   |  14.4    | 153   |  12.1    | 91    |  10.8    | 65    |
| 2000  |                        |  59.2    | 331   |  25.1    | 171   |  28.1    | 121   |  28.4    | 102   |
| 2005  |                        |  29.7    | 817   |  34.0    | 803   |  6.4     | 452   |  12.6    | 405   |
| 2010  |                        |  17.3    | 773   |  6.2     | 662   |  2.9     | 611   |  5.3     | 568   |
| 1995  | Bogotá                 |  15.0    | 80    |  11.1    | 63    |  7.4     | 54    |  9.3     | 43    |
| 2000  |                        |  17.5    | 114   |  17.0    | 106   |  15.2    | 99    |  10.0    | 80    |
| 2005  |                        |  4.7     | 127   |  41.5    | 164   |  4.2     | 96    |  4.2     | 95    |
| 2010  |                        |  .8      | 122   |  28.9    | 152   |  .9      | 112   |  2.8     | 109   |
| 1995  | Central                |  21.1  | 190   |  5.1   | 137   |  1.9   | 105   |  10.0  | 100   |
| 2000  |                        |  34.0  | 288   |  24.2  | 244   |  15.7  | 178   |  22.4  | 170   |
| 2005  |                        |  19.4  | 572   |  28.6  | 566   |  5.2   | 348   |  7.8   | 320   |
| 2010  |                        |  6.1   | 575   |  9.7   | 555   |  1.6   | 513   |  3.3   | 511   |
| 1995  | Oriental               |  21.1  | 128   |  3.2   | 95    |  6.7   | 60    |  .0    | 52    |
| 2000  |                        |  46.5  | 202   |  12.3  | 122   |  18.3  | 120   |  24.4  | 123   |
| 2005  |                        |  11.3  | 345   |  32.8  | 381   |  3.7   | 244   |  8.2   | 232   |
| 2010  |                        |  6.5   | 397   |  15.4  | 408   |  1.5   | 323   |  7.9   | 318   |
| 1995  | Pacífica               |  34.5  | 145   |  3.5   | 86    |  4.4   | 68    |  6.5   | 62    |
| 2000  |                        |  42.0  | 169   |  18.5  | 119   |  13.7  | 95    |  24.7  | 89    |
| 2005  |                        |  21.4  | 406   |  23.2  | 383   |  5.9   | 273   |  7.3   | 247   |
| 2010  |                        |  12.1  | 429   |  7.7   | 378   |  2.3   | 349   |  3.6   | 333   |
| 2005  | Territorios Nacionales |  17.7  | 361   |  10.6  | 320   |  4.9   | 244   |  4.1   | 219   |
| 2010  | Territorios Nacionales |  8.8   | 661   |  9.6   | 627   |  2.3   | 574   |  3.3   | 517   |
| Scale |                        |  100.0 |       |  100.0 |       |  100.0 |       |  100.0 |       |

Notes for this table appear after Table SC.2c

**Table SC.2b. Visit-based MOSV analysis – Colombia – DPT1-3 and MCV1**

| Year  | Stratum                | Visits with MOSV for DPT1 (%)                                                             | N     | Visits with MOSV for DPT2 (%)                                                             | N     | Visits with MOSV for DPT3 (%)                                                              | N     | Visits with MOSV for MCV (%)                                                                | N     |
|-------|------------------------|-------------------------------------------------------------------------------------------|-------|-------------------------------------------------------------------------------------------|-------|--------------------------------------------------------------------------------------------|-------|---------------------------------------------------------------------------------------------|-------|
| 1995  | Colombia               |  8.4     | 536   |  4.4     | 361   |  7.5     | 319   |  22.5    | 71    |
| 2000  |                        |  22.4    | 780   |  20.3    | 629   |  21.9    | 584   |  22.9    | 516   |
| 2005  |                        |  6.7     | 2,137 |  4.2     | 1,756 |  8.8     | 1,661 |  9.8     | 1,575 |
| 2010  |                        |  5.2     | 2,623 |  1.8     | 2,482 |  3.5     | 2,344 |  7.1     | 2,228 |
| 1995  | Atlántica              |  10.9    | 147   |  6.3     | 80    |  16.4    | 67    |  17.9    | 28    |
| 2000  |                        |  23.1    | 173   |  26.4    | 121   |  29.4    | 109   |  24.0    | 104   |
| 2005  |                        |  8.0     | 624   |  5.4     | 481   |  10.1    | 436   |  14.6    | 458   |
| 2010  |                        |  6.0     | 650   |  2.2     | 601   |  4.5     | 559   |  7.8     | 540   |
| 1995  | Bogotá                 |  13.6    | 66    |  7.5     | 53    |  7.0     | 43    |  12.5    | 8     |
| 2000  |                        |  20.7    | 111   |  13.3    | 98    |  11.6    | 86    |  14.3    | 70    |
| 2005  |                        |  9.2     | 120   |  4.5     | 112   |  3.6     | 110   |  5.1     | 78    |
| 2010  |                        |  2.5     | 122   |  .0      | 122   |  2.6     | 117   |  3.8     | 106   |
| 1995  | Central                |  5.1   | 136   |  1.0   | 102   |  5.3   | 94    |  53.8  | 13    |
| 2000  |                        |  28.3  | 251   |  21.9  | 192   |  21.6  | 171   |  25.3  | 158   |
| 2005  |                        |  4.5   | 448   |  4.3   | 374   |  7.8   | 346   |  7.0   | 341   |
| 2010  |                        |  9.2   | 544   |  1.4   | 507   |  2.6   | 501   |  6.1   | 490   |
| 1995  | Oriental               |  5.2   | 96    |  6.7   | 60    |  .0    | 52    |  16.7  | 12    |
| 2000  |                        |  15.1  | 126   |  16.9  | 118   |  26.4  | 129   |  25.5  | 110   |
| 2005  |                        |  4.0   | 300   |  1.9   | 263   |  10.5  | 277   |  8.8   | 227   |
| 2010  |                        |  2.3   | 352   |  3.3   | 331   |  3.3   | 307   |  4.0   | 301   |
| 1995  | Pacífica               |  8.8   | 91    |  3.0   | 66    |  7.9   | 63    |  10.0  | 10    |
| 2000  |                        |  18.5  | 119   |  21.0  | 100   |  16.9  | 89    |  20.3  | 74    |
| 2005  |                        |  10.9  | 341   |  4.3   | 281   |  8.5   | 258   |  8.9   | 224   |
| 2010  |                        |  3.3   | 361   |  1.7   | 354   |  5.0   | 341   |  8.3   | 300   |
| 2005  | Territorios Nacionales |  4.3   | 304   |  4.1   | 245   |  8.5   | 234   |  8.1   | 247   |
| 2010  | Territorios Nacionales |  4.2   | 594   |  1.4   | 567   |  2.5   | 519   |  9.2   | 491   |
| Scale |                        |  100.0 |       |  100.0 |       |  100.0 |       |  100.0 |       |

Notes for this table appear after Table SC.2c

**Table SC.2c. Visit-based MOSV analysis – Colombia – Any dose, MOSVs per visit & Visits between MOSVs**

| Year  | Stratum                | Visits with MOSV for any dose (%)                                                         | N      | MOSVs per Visit                                                                           | N      | Visits between MOSVs                                                                       |
|-------|------------------------|-------------------------------------------------------------------------------------------|--------|-------------------------------------------------------------------------------------------|--------|--------------------------------------------------------------------------------------------|
| 1995  | Colombia               |  18.5    | 1,842  |  0.230   | 1,842  |  4.3    |
| 2000  |                        |  33.1    | 3,301  |  0.431   | 3,301  |  2.3    |
| 2005  |                        |  18.7    | 9,368  |  0.217   | 9,368  |  4.6    |
| 2010  |                        |  8.5     | 12,391 |  0.095   | 12,391 |  10.5   |
| 1995  | Atlántica              |  29.1    | 484    |  0.372   | 484    |  2.7    |
| 2000  |                        |  45.4    | 764    |  0.564   | 764    |  1.8    |
| 2005  |                        |  24.9    | 2,627  |  0.298   | 2,627  |  3.4    |
| 2010  |                        |  9.8     | 3,015  |  0.113   | 3,015  |  8.8    |
| 1995  | Bogotá                 |  14.3    | 230    |  0.191   | 230    |  5.2    |
| 2000  |                        |  18.0    | 450    |  0.260   | 450    |  3.8    |
| 2005  |                        |  17.0    | 546    |  0.194   | 546    |  5.2    |
| 2010  |                        |  9.2    | 588    |  0.100  | 588    |  10.0  |
| 1995  | Central                |  13.1  | 495    |  0.160 | 495    |  6.3  |
| 2000  |                        |  31.3  | 973    |  0.424 | 973    |  2.4  |
| 2005  |                        |  18.2  | 2,019  |  0.200 | 2,019  |  5.0  |
| 2010  |                        |  7.5   | 2,589  |  0.083 | 2,589  |  12.1 |
| 1995  | Oriental               |  11.8  | 321    |  0.140 | 321    |  7.1  |
| 2000  |                        |  32.0  | 606    |  0.432 | 606    |  2.3  |
| 2005  |                        |  16.5  | 1,386  |  0.186 | 1,386  |  5.4  |
| 2010  |                        |  8.8   | 1,713  |  0.093 | 1,713  |  10.7 |
| 1995  | Pacífica               |  20.5  | 312    |  0.244 | 312    |  4.1  |
| 2000  |                        |  32.5  | 508    |  0.396 | 508    |  2.5  |
| 2005  |                        |  17.8  | 1,433  |  0.210 | 1,433  |  4.8  |
| 2010  |                        |  8.4   | 1,744  |  0.092 | 1,744  |  10.8 |
| 2005  | Territorios Nacionales |  11.4  | 1,357  |  0.134 | 1,357  |  7.5  |
| 2010  |                        |  7.7   | 2,742  |  0.087 | 2,742  |  11.5 |
| Scale |                        |  100.0 |        |  1.000 |        |  15.0 |

|                                                                                                           |
|-----------------------------------------------------------------------------------------------------------|
| Notes:                                                                                                    |
| Percent of visits where children were eligible for the dose and did not receive it.                       |
| This is a crude dose analysis, meaning that early doses are accepted and counted in this analysis.        |
| The final two measures on this sheet, MOSVs per visit and Visits between MOSVs are NOT percentages.       |
| These analyses are unweighted.                                                                            |
| The stratum named 'Territorios Nacionales' appears only in the 2005 and 2010 surveys.                     |
| Blue columns labeled (%) are shaded such that 100% would fill the entire table cell.                      |
| The orange column labeled 'MOSVs per visit' are shaded such that 1.0 would fill the entire cell.          |
| The pink column labeled 'Visits between MOSVs' is shaded such that 15.0 would fill the entire table cell. |



**Table SN.3a. Child-based MOSV analysis – Nigeria – National Results**

| Stratum      | BCG              | DPT1            | DPT2            | DPT3           | MCV1            | OPV1            | OPV2           | OPV3           | Summary               |
|--------------|------------------|-----------------|-----------------|----------------|-----------------|-----------------|----------------|----------------|-----------------------|
| Nigeria 1990 | 408   9   6      | 299   63   15   | 295   3   0     | 242   1   6    | 218   23   40   | 309   59   10   | 294   3   0    | 241   3   6    | 294   82   5   57     |
| Nigeria 1999 | 184   13   7     | 82   55   27    | 115   4   6     | 86   2   14    | 96   11   14    | 65   76   15    | 122   5   2    | 90   1   22    | 75   57   38   40     |
| Nigeria 2003 | 201   10   10    | 94   44   28    | 110   3   4     | 82   6   9     | 74   10   21    | 76   47   31    | 102   2   6    | 76   3   12    | 97   49   27   51     |
| Nigeria 2008 | 825   176   126  | 624   271   50  | 736   37   12   | 684   30   15  | 593   91   91   | 486   272   79  | 638   36   33  | 554   28   26  | 506   422   125   188 |
| Nigeria 2013 | 1256   260   66  | 762   490   46  | 1023   121   19 | 927   90   27  | 838   110   107 | 700   442   43  | 994   94   18  | 879   84   27  | 732   721   121   142 |
| Nigeria 2018 | 1844   259   130 | 1288   159   67 | 1346   34   10  | 1301   29   16 | 960   75   128  | 1288   148   49 | 1317   29   19 | 1277   31   22 | 1514   439   71   242 |

Calculations use crude measures of MOV. Dose columns show counts: Vaccinated at First Eligible Opportunity | MOV - Later Corrected | MOV - Uncorrected.

Summary column shows, for each stratum, counts: No MOVs | All MOVs Corrected | Mixture Corrected/Uncorrected | All MOVs Uncorrected.

Summary column calculated using the following doses: BCG, DPT1, DPT2, DPT3, MCV1, OPV1, OPV2, OPV3

**Figure SN.3. Child-based MOSV analysis – Nigeria – Subnational Detail**

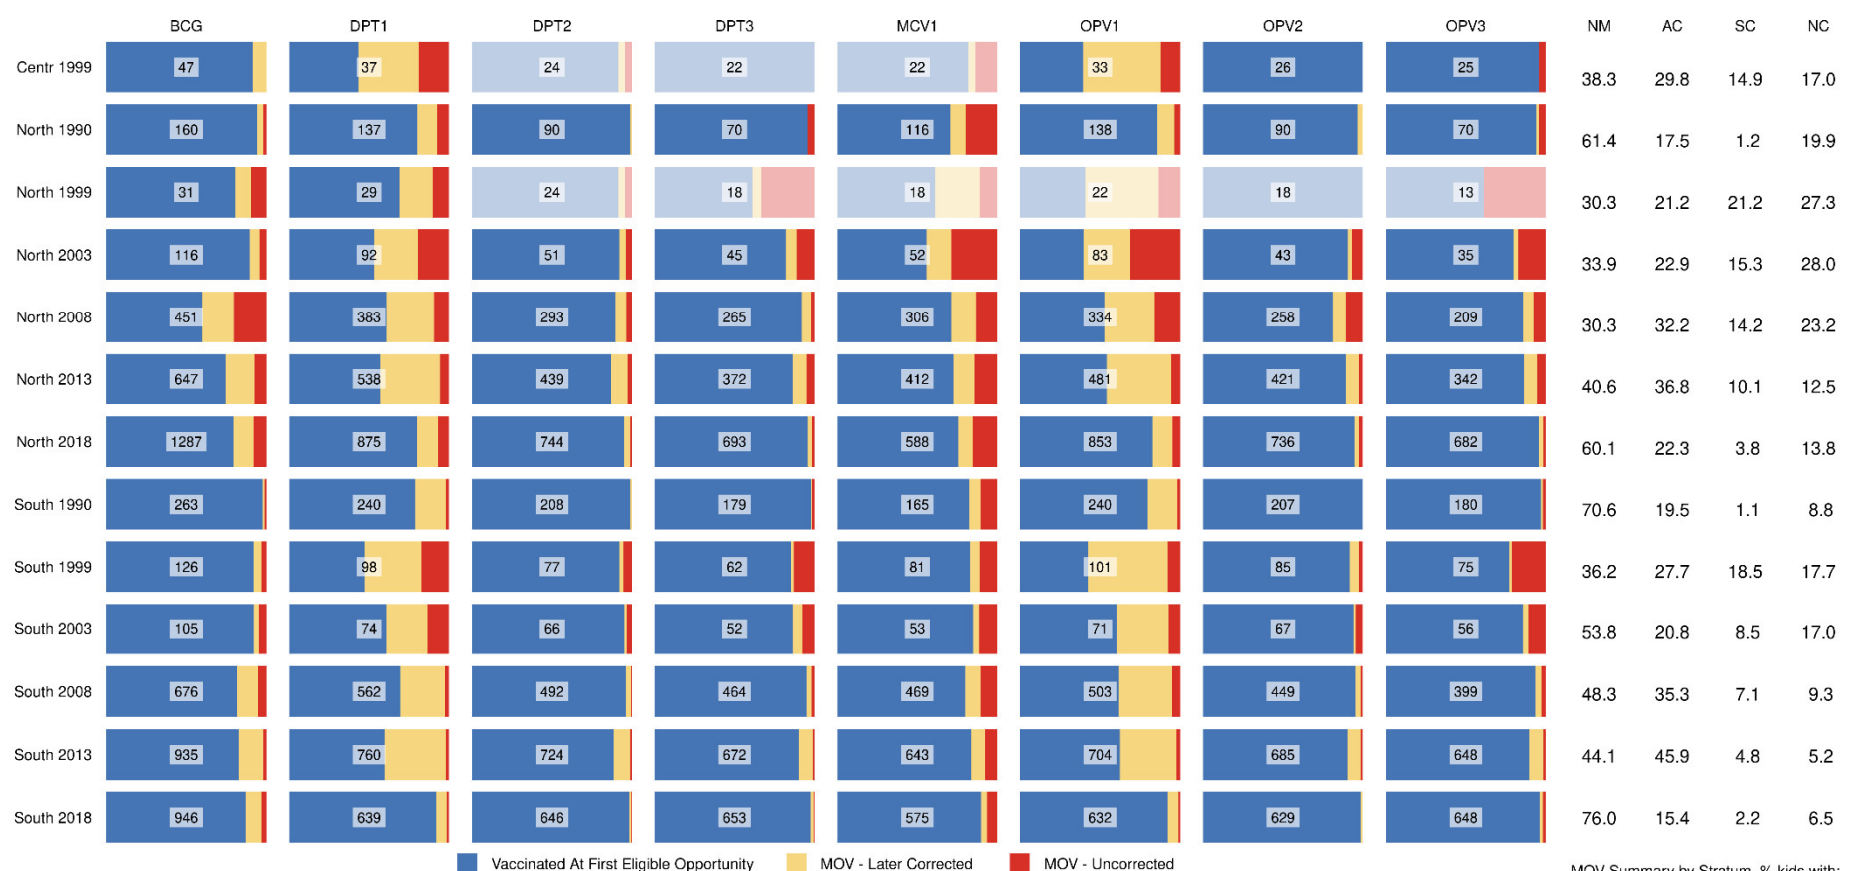

Crude measures of MOV shown. Figure shows suppressed output for bars where  $n < 25$ . Sample size is shown on each bar.

The stratum summary table shows information for the following doses: BCG, DPT1, DPT2, DPT3, MCV1, OPV1, OPV2, OPV3.

MOV Summary by Stratum. % kids with:  
 NM = no MOVs; AC = all MOVs corrected;  
 SC = some corrected; NC = none corrected.  
 Percentages in each row sum to 100%.

**Table SN.3b. Child-based MOSV analysis – Nigeria – Subnational Detail**

| Stratum    | BCG              | DPT1           | DPT2          | DPT3          | MCV1          | OPV1           | OPV2          | OPV3          | Summary              |
|------------|------------------|----------------|---------------|---------------|---------------|----------------|---------------|---------------|----------------------|
| Centr 1999 | 43   4   0       | 16   14   7    | 22   1   1    | 22   0   0    | 18   1   3    | 13   16   4    | 26   0   0    | 24   0   1    | 18   14   7   8      |
| North 1990 | 151   6   3      | 110   17   10  | 89   1   0    | 67   0   3    | 82   11   23  | 118   15   5   | 87   3   0    | 66   1   3    | 102   29   2   33    |
| North 1999 | 25   3   3       | 20   6   3     | 22   1   1    | 11   1   6    | 11   5   2    | 9   10   3     | 18   0   0    | 8   0   5     | 10   7   7   9       |
| North 2003 | 104   7   5      | 49   25   18   | 47   2   2    | 37   3   5    | 29   8   15   | 33   24   26   | 39   1   3    | 28   1   6    | 40   27   18   33    |
| North 2008 | 271   89   91    | 234   113   36 | 263   20   10 | 244   15   6  | 218   47   41 | 176   104   54 | 210   21   27 | 180   13   16 | 158   168   74   121 |
| North 2013 | 482   116   49   | 307   201   30 | 381   47   11 | 321   32   19 | 299   54   59 | 261   192   28 | 376   35   10 | 296   28   18 | 295   267   73   91  |
| North 2018 | 1022   164   101 | 699   118   58 | 709   27   8  | 664   17   12 | 444   53   91 | 705   106   42 | 697   21   18 | 653   18   11 | 784   291   50   180 |
| South 1990 | 257   3   3      | 189   46   5   | 206   2   0   | 175   1   3   | 136   12   17 | 191   44   5   | 207   0   0   | 175   2   3   | 192   53   3   24    |
| South 1999 | 116   6   4      | 46   35   17   | 71   2   4    | 53   1   8    | 67   5   9    | 43   50   8    | 78   5   2    | 58   1   16   | 47   36   24   23    |
| South 2003 | 97   3   5       | 45   19   10   | 63   1   2    | 45   3   4    | 45   2   6    | 43   23   5    | 63   1   3    | 48   2   6    | 57   22   9   18     |
| South 2008 | 554   87   35    | 390   158   14 | 473   17   2  | 440   15   9  | 375   44   50 | 310   168   25 | 428   15   6  | 374   15   10 | 348   254   51   67  |
| South 2013 | 774   144   17   | 455   289   16 | 642   74   8  | 606   58   8  | 539   56   48 | 439   250   15 | 618   59   8  | 583   56   9  | 437   454   48   51  |
| South 2018 | 822   95   29    | 589   41   9   | 637   7   2   | 637   12   4  | 516   22   37 | 583   42   7   | 620   8   1   | 624   13   11 | 730   148   21   62  |

Calculations use crude measures of MOV. Dose columns show counts: Vaccinated at First Eligible Opportunity | MOV - Later Corrected | MOV - Uncorrected.

Summary column shows, for each stratum, counts: No MOVs | All MOVs Corrected | Mixture Corrected/Uncorrected | All MOVs Uncorrected.

Summary column calculated using the following doses: BCG, DPT1, DPT2, DPT3, MCV1, OPV1, OPV2, OPV3

**Table SC.3a. Child-based MOSV analysis – Colombia – National Results**

| Stratum       | BCG             | DPT1           | DPT2          | DPT3           | MCV            | OPV1             | OPV2           | OPV3           | Summary               |
|---------------|-----------------|----------------|---------------|----------------|----------------|------------------|----------------|----------------|-----------------------|
| Colombia 1995 | 469   85   23   | 452   39   3   | 337   8   6   | 275   20   3   | 51   4   6     | 457   35   4     | 342   12   8   | 279   18   5   | 436   139   15   29   |
| Colombia 2000 | 457   168   41  | 487   118   9  | 409   92   9  | 375   81   17  | 347   51   41  | 492   113   8    | 424   77   12  | 360   77   21  | 232   326   72   53   |
| Colombia 2005 | 1788   290   50 | 1912   82   19 | 1625   57   9 | 1430   85   38 | 1340   80   58 | 1740   126   162 | 1509   60   11 | 1321   71   40 | 1398   479   92   235 |
| Colombia 2010 | 2510   141   40 | 2427   59   22 | 2402   35   8 | 2213   50   21 | 1990   80   68 | 2415   76   62   | 2388   41   10 | 2205   47   37 | 2156   363   38   193 |

Calculations use crude measures of MOV. Dose columns show counts: Vaccinated at First Eligible Opportunity | MOV - Later Corrected | MOV - Uncorrected.

Summary column shows, for each stratum, counts: No MOVs | All MOVs Corrected | Mixture Corrected/Uncorrected | All MOVs Uncorrected.

Summary column calculated using the following doses: BCG, DPT1, DPT2, DPT3, MCV, OPV1, OPV2, OPV3

**Figure SC.3. Child-based MOSV analysis – Colombia - Subnational Detail**

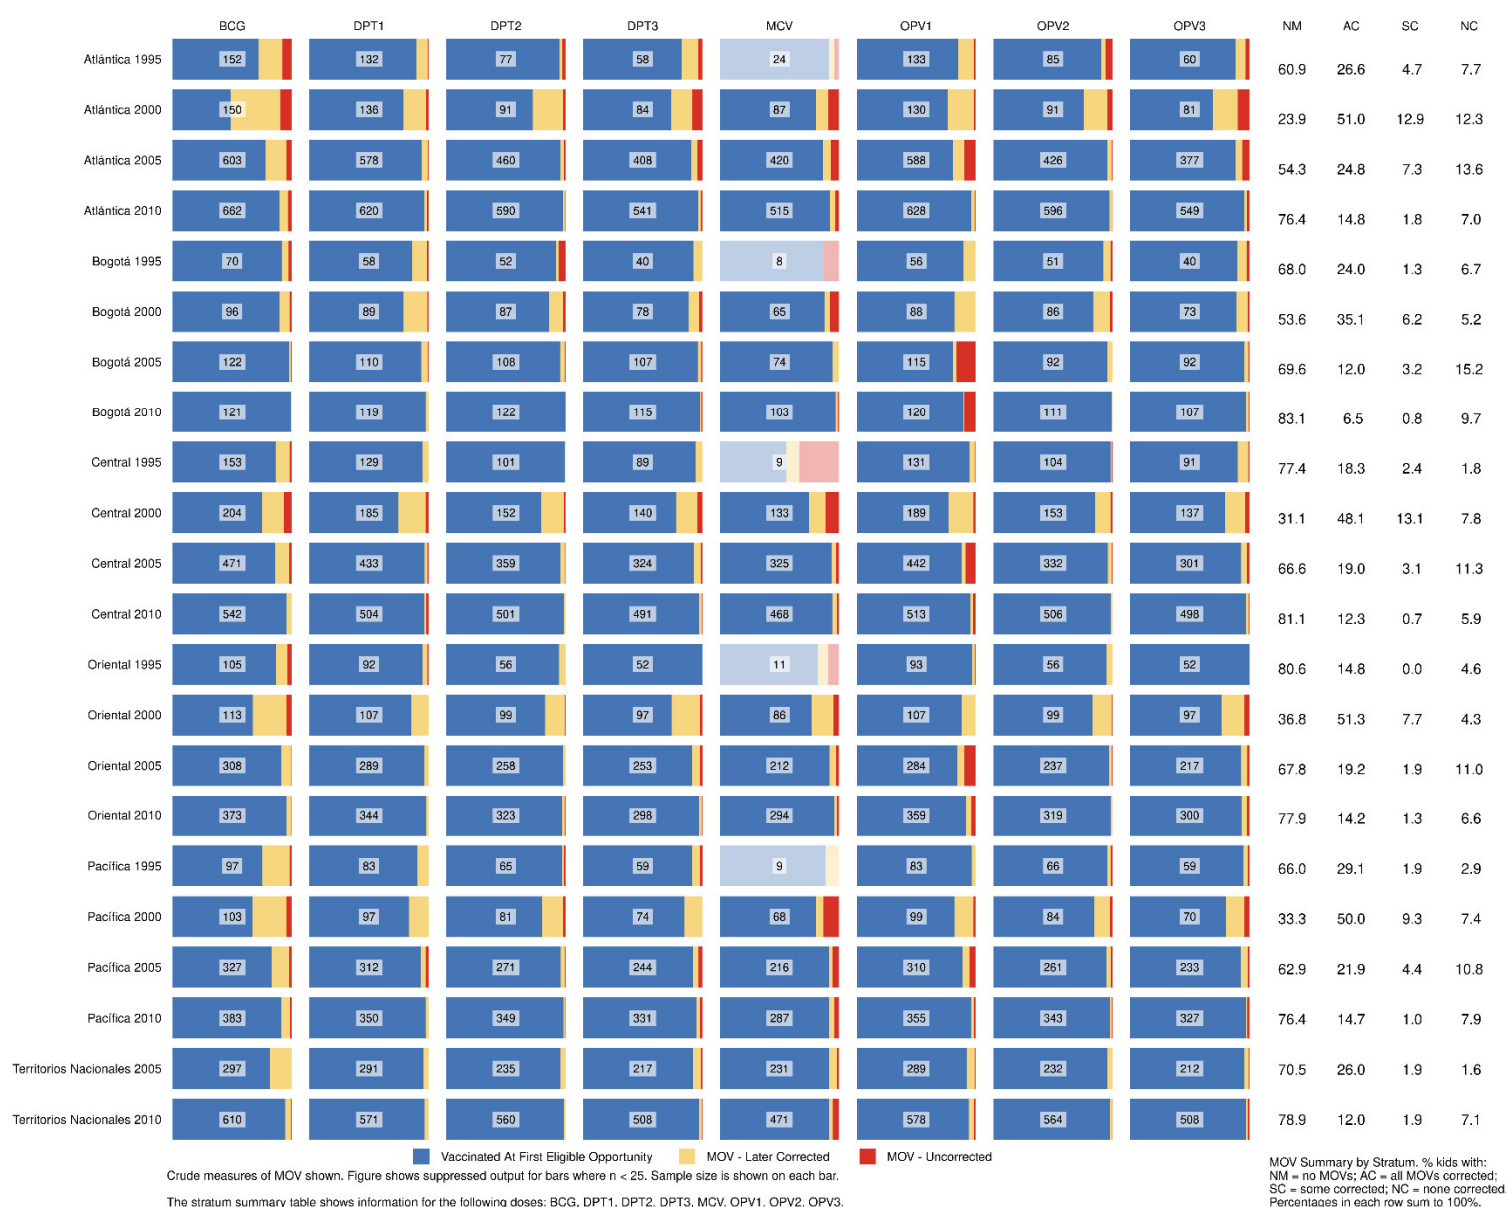

**Table SC.3b. Child-based MOSV analysis – Colombia - Subnational Detail**

| Stratum                     | BCG            | DPT1         | DPT2         | DPT3          | MCV           | OPV1          | OPV2         | OPV3          | Summary             |
|-----------------------------|----------------|--------------|--------------|---------------|---------------|---------------|--------------|---------------|---------------------|
| Atlántica 1995              | 109   31   12  | 118   13   1 | 73   2   2   | 48   8   2    | 22   1   1    | 113   18   2  | 77   3   5   | 53   5   2    | 103   45   8   13   |
| Atlántica 2000              | 73   62   15   | 107   26   3 | 66   23   2  | 62   15   7   | 70   9   8    | 99   29   2   | 69   18   4  | 56   17   8   | 37   79   20   19   |
| Atlántica 2005              | 471   103   29 | 543   31   4 | 440   15   5 | 370   22   16 | 362   29   29 | 476   54   58 | 406   17   3 | 332   22   23 | 340   155   46   85 |
| Atlántica 2010              | 593   46   23  | 596   15   9 | 577   11   2 | 523   11   7  | 475   23   17 | 602   19   7  | 580   13   3 | 526   12   11 | 520   101   12   48 |
| Bogotá 1995                 | 64   4   2     | 50   7   1   | 48   1   3   | 37   3   0    | 7   0   1     | 50   6   0    | 47   3   1   | 36   3   1    | 51   18   1   5     |
| Bogotá 2000                 | 86   8   2     | 70   18   1  | 75   10   2  | 69   7   2    | 57   3   5    | 72   16   0   | 72   12   2  | 65   7   1    | 52   34   6   5     |
| Bogotá 2005                 | 119   2   1    | 103   6   1  | 103   4   1  | 103   3   1   | 70   4   0    | 93   3   19   | 88   4   0   | 88   3   1    | 87   15   4   19    |
| Bogotá 2010                 | 120   1   0    | 116   3   0  | 122   0   0  | 113   1   1   | 100   2   1   | 107   1   12  | 110   1   0  | 104   2   1   | 103   8   1   12    |
| Central 1995                | 132   18   3   | 122   7   0  | 100   1   0  | 84   5   0    | 5   1   3     | 124   6   1   | 102   1   1  | 82   8   1    | 127   30   4   3    |
| Central 2000                | 153   37   14  | 138   42   5 | 121   29   2 | 109   25   6  | 99   19   15  | 146   39   4  | 130   20   3 | 109   23   5  | 64   99   27   16   |
| Central 2005                | 404   57   10  | 418   10   5 | 344   14   1 | 301   18   5  | 305   12   8  | 390   14   38 | 318   12   2 | 280   15   6  | 319   91   15   54  |
| Central 2010                | 517   23   2   | 486   8   10 | 494   6   1  | 478   10   3  | 441   19   8  | 490   11   12 | 498   7   1  | 484   10   4  | 450   68   4   33   |
| Oriental 1995               | 91   10   4    | 87   4   1   | 53   3   0   | 52   0   0    | 9   1   1     | 90   2   1    | 53   3   0   | 52   0   0    | 87   16   0   5     |
| Oriental 2000               | 76   32   5    | 91   16   0  | 82   16   1  | 72   23   2   | 66   16   4   | 94   13   0   | 82   16   1  | 74   19   4   | 43   60   9   5     |
| Oriental 2005               | 281   25   2   | 278   10   1 | 253   5   0  | 231   17   5  | 195   12   5  | 240   16   28 | 229   6   2  | 202   11   4  | 215   61   6   35   |
| Oriental 2010               | 356   15   2   | 337   7   0  | 314   6   3  | 289   8   1   | 282   7   5   | 330   15   14 | 314   4   1  | 280   13   7  | 296   54   5   25   |
| Pacífica 1995               | 73   22   2    | 75   8   0   | 63   1   1   | 54   4   1    | 8   1   0     | 80   3   0    | 63   2   1   | 56   2   1    | 68   30   2   3     |
| Pacífica 2000               | 69   29   5    | 81   16   0  | 65   14   2  | 63   11   0   | 55   4   9    | 81   16   2   | 71   11   2  | 56   11   3   | 36   54   10   8    |
| Pacífica 2005               | 271   48   8   | 292   12   8 | 260   9   2  | 225   11   8  | 197   7   12  | 275   19   16 | 247   10   4 | 216   13   4  | 215   75   15   37  |
| Pacífica 2010               | 349   28   6   | 341   8   1  | 343   5   1  | 315   9   7   | 262   13   12 | 342   7   6   | 335   6   2  | 317   4   6   | 301   58   4   31   |
| Territorios Nacionales 2005 | 242   55   0   | 278   13   0 | 225   10   0 | 200   14   3  | 211   16   4  | 266   20   3  | 221   11   0 | 203   7   2   | 222   82   6   5    |
| Territorios Nacionales 2010 | 575   28   7   | 551   18   2 | 552   7   1  | 495   11   2  | 430   16   25 | 544   23   11 | 551   10   3 | 494   6   8   | 486   74   12   44  |

Calculations use crude measures of MOV. Dose columns show counts: Vaccinated at First Eligible Opportunity | MOV - Later Corrected | MOV - Uncorrected.

Summary column shows, for each stratum, counts: No MOVs | All MOVs Corrected | Mixture Corrected/Uncorrected | All MOVs Uncorrected.

Summary column calculated using the following doses: BCG, DPT1, DPT2, DPT3, MCV, OPV1, OPV2, OPV3

**Table SN.4. MOSV Consequences – Nigeria – Potential Coverage Increase – National Results**

|                                                                                                                                                                          | Card Seen (%)             |                           | Crude Cvg (%) | Up (%)                    | Valid Cvg (%) | Up (%)                    |   | Crude Cvg (%)             | Up (%) | Valid Cvg (%)             | Up (%) |                           | Crude Cvg (%) | Up (%)                    | Valid Cvg (%) | Up (%)                    |    | Crude Cvg (%) | Up (%) | Valid Cvg (%) | Up (%) |  |
|--------------------------------------------------------------------------------------------------------------------------------------------------------------------------|---------------------------|---------------------------|---------------|---------------------------|---------------|---------------------------|---|---------------------------|--------|---------------------------|--------|---------------------------|---------------|---------------------------|---------------|---------------------------|----|---------------|--------|---------------|--------|--|
|                                                                                                                                                                          |                           |                           | BCG           |                           |               |                           |   | OPV1                      |        |                           |        |                           | OPV2          |                           |               |                           |    |               | OPV3   |               |        |  |
| 1990                                                                                                                                                                     | <div><div></div></div> 36 | <div><div></div></div> 61 | 1             | <div><div></div></div> 34 | 2             | <div><div></div></div> 64 | 1 | <div><div></div></div> 33 | 2      | <div><div></div></div> 48 | 0      | <div><div></div></div> 22 | 1             | <div><div></div></div> 35 | 0             | <div><div></div></div> 13 | 3  |               |        |               |        |  |
| 1999                                                                                                                                                                     | <div><div></div></div> 21 | <div><div></div></div> 57 | 1             | <div><div></div></div> 19 | 1             | <div><div></div></div> 59 | 1 | <div><div></div></div> 17 | 3      | <div><div></div></div> 48 | 2      | <div><div></div></div> 13 | 5             | <div><div></div></div> 28 | 4             | <div><div></div></div> 7  | 8  |               |        |               |        |  |
| 2003                                                                                                                                                                     | <div><div></div></div> 22 | <div><div></div></div> 49 | 1             | <div><div></div></div> 20 | 1             | <div><div></div></div> 67 | 3 | <div><div></div></div> 16 | 4      | <div><div></div></div> 54 | 3      | <div><div></div></div> 10 | 5             | <div><div></div></div> 31 | 2             | <div><div></div></div> 5  | 6  |               |        |               |        |  |
| 2008                                                                                                                                                                     | <div><div></div></div> 26 | <div><div></div></div> 50 | 2             | <div><div></div></div> 21 | 5             | <div><div></div></div> 68 | 2 | <div><div></div></div> 21 | 4      | <div><div></div></div> 58 | 2      | <div><div></div></div> 16 | 5             | <div><div></div></div> 39 | 2             | <div><div></div></div> 9  | 8  |               |        |               |        |  |
| 2013                                                                                                                                                                     | <div><div></div></div> 28 | <div><div></div></div> 51 | 1             | <div><div></div></div> 24 | 3             | <div><div></div></div> 77 | 1 | <div><div></div></div> 24 | 2      | <div><div></div></div> 70 | 1      | <div><div></div></div> 20 | 4             | <div><div></div></div> 54 | 1             | <div><div></div></div> 11 | 10 |               |        |               |        |  |
| 2018                                                                                                                                                                     | <div><div></div></div> 40 | <div><div></div></div> 67 | 2             | <div><div></div></div> 35 | 3             | <div><div></div></div> 74 | 1 | <div><div></div></div> 34 | 2      | <div><div></div></div> 67 | 1      | <div><div></div></div> 29 | 3             | <div><div></div></div> 48 | 1             | <div><div></div></div> 17 | 11 |               |        |               |        |  |
|                                                                                                                                                                          |                           |                           |               |                           |               |                           |   |                           |        |                           |        |                           |               |                           |               |                           |    |               |        |               |        |  |
|                                                                                                                                                                          | Card Seen (%)             |                           | Crude Cvg (%) | Up (%)                    | Valid Cvg (%) | Up (%)                    |   | Crude Cvg (%)             | Up (%) | Valid Cvg (%)             | Up (%) |                           | Crude Cvg (%) | Up (%)                    | Valid Cvg (%) | Up (%)                    |    |               |        |               |        |  |
|                                                                                                                                                                          |                           |                           | DPT1          |                           |               |                           |   | DPT2                      |        |                           |        |                           | DPT3          |                           |               |                           |    | MCV1          |        |               |        |  |
| 1990                                                                                                                                                                     | <div><div></div></div> 36 | <div><div></div></div> 63 | 1             | <div><div></div></div> 32 | 2             | <div><div></div></div> 48 | 0 | <div><div></div></div> 22 | 1      | <div><div></div></div> 34 | 0      | <div><div></div></div> 13 | 4             | <div><div></div></div> 45 | 4             | <div><div></div></div> 19 | 5  |               |        |               |        |  |
| 1999                                                                                                                                                                     | <div><div></div></div> 21 | <div><div></div></div> 50 | 3             | <div><div></div></div> 16 | 3             | <div><div></div></div> 42 | 3 | <div><div></div></div> 12 | 6      | <div><div></div></div> 29 | 4      | <div><div></div></div> 7  | 8             | <div><div></div></div> 43 | 1             | <div><div></div></div> 10 | 2  |               |        |               |        |  |
| 2003                                                                                                                                                                     | <div><div></div></div> 22 | <div><div></div></div> 43 | 3             | <div><div></div></div> 17 | 3             | <div><div></div></div> 33 | 2 | <div><div></div></div> 11 | 4      | <div><div></div></div> 23 | 2      | <div><div></div></div> 5  | 6             | <div><div></div></div> 37 | 2             | <div><div></div></div> 9  | 2  |               |        |               |        |  |
| 2008                                                                                                                                                                     | <div><div></div></div> 26 | <div><div></div></div> 52 | 1             | <div><div></div></div> 23 | 2             | <div><div></div></div> 45 | 1 | <div><div></div></div> 18 | 3      | <div><div></div></div> 36 | 1      | <div><div></div></div> 11 | 6             | <div><div></div></div> 41 | 2             | <div><div></div></div> 14 | 2  |               |        |               |        |  |
| 2013                                                                                                                                                                     | <div><div></div></div> 28 | <div><div></div></div> 51 | 1             | <div><div></div></div> 25 | 2             | <div><div></div></div> 46 | 1 | <div><div></div></div> 21 | 3      | <div><div></div></div> 39 | 1      | <div><div></div></div> 12 | 8             | <div><div></div></div> 42 | 2             | <div><div></div></div> 15 | 3  |               |        |               |        |  |
| 2018                                                                                                                                                                     | <div><div></div></div> 40 | <div><div></div></div> 65 | 1             | <div><div></div></div> 34 | 2             | <div><div></div></div> 58 | 1 | <div><div></div></div> 30 | 3      | <div><div></div></div> 51 | 1      | <div><div></div></div> 17 | 10            | <div><div></div></div> 54 | 2             | <div><div></div></div> 18 | 3  |               |        |               |        |  |
|                                                                                                                                                                          |                           |                           |               |                           |               |                           |   |                           |        |                           |        |                           |               |                           |               |                           |    |               |        |               |        |  |
| Gold columns labeled 'Up (%)' show increase in crude or valid coverage if respondents with cards had received every eligible dose at every documented vaccination visit. |                           |                           |               |                           |               |                           |   |                           |        |                           |        |                           |               |                           |               |                           |    |               |        |               |        |  |
| Color bars are scaled so that 100% would fill the entire table cell.                                                                                                     |                           |                           |               |                           |               |                           |   |                           |        |                           |        |                           |               |                           |               |                           |    |               |        |               |        |  |
| All outcomes are weighted.                                                                                                                                               |                           |                           |               |                           |               |                           |   |                           |        |                           |        |                           |               |                           |               |                           |    |               |        |               |        |  |

**Table SC.4. MOSV Consequences – Colombia – Potential Coverage Increase – National Results**

|                                                                                                                                                                          | Card Seen (%)             | Crude Cvg (%)             | Up (%) | Valid Cvg (%)             | Up (%) | Crude Cvg (%)             | Up (%) | Valid Cvg (%)             | Up (%) | Crude Cvg (%)             | Up (%) | Valid Cvg (%)             | Up (%) | Crude Cvg (%)             | Up (%) | Valid Cvg (%)             | Up (%) |
|--------------------------------------------------------------------------------------------------------------------------------------------------------------------------|---------------------------|---------------------------|--------|---------------------------|--------|---------------------------|--------|---------------------------|--------|---------------------------|--------|---------------------------|--------|---------------------------|--------|---------------------------|--------|
|                                                                                                                                                                          |                           | BCG                       |        |                           |        | OPV1                      |        |                           |        | OPV2                      |        |                           |        | OPV3                      |        |                           |        |
| 1995                                                                                                                                                                     | <div><div></div></div> 62 | <div><div></div></div> 94 | 2      | <div><div></div></div> 54 | 7      | <div><div></div></div> 97 | 0      | <div><div></div></div> 59 | 1      | <div><div></div></div> 91 | 1      | <div><div></div></div> 56 | 3      | <div><div></div></div> 77 | 1      | <div><div></div></div> 40 | 11     |
| 2000                                                                                                                                                                     | <div><div></div></div> 75 | <div><div></div></div> 95 | 3      | <div><div></div></div> 69 | 6      | <div><div></div></div> 97 | 1      | <div><div></div></div> 73 | 2      | <div><div></div></div> 89 | 2      | <div><div></div></div> 67 | 4      | <div><div></div></div> 72 | 5      | <div><div></div></div> 54 | 13     |
| 2005                                                                                                                                                                     | <div><div></div></div> 78 | <div><div></div></div> 97 | 2      | <div><div></div></div> 74 | 4      | <div><div></div></div> 89 | 7      | <div><div></div></div> 71 | 7      | <div><div></div></div> 83 | 7      | <div><div></div></div> 68 | 8      | <div><div></div></div> 70 | 8      | <div><div></div></div> 56 | 15     |
| 2010                                                                                                                                                                     | <div><div></div></div> 83 | <div><div></div></div> 97 | 1      | <div><div></div></div> 75 | 3      | <div><div></div></div> 94 | 3      | <div><div></div></div> 75 | 3      | <div><div></div></div> 91 | 3      | <div><div></div></div> 74 | 4      | <div><div></div></div> 83 | 4      | <div><div></div></div> 65 | 9      |
|                                                                                                                                                                          |                           |                           |        |                           |        |                           |        |                           |        |                           |        |                           |        |                           |        |                           |        |
|                                                                                                                                                                          | Card Seen (%)             | Crude Cvg (%)             | Up (%) | Valid Cvg (%)             | Up (%) | Crude Cvg (%)             | Up (%) | Valid Cvg (%)             | Up (%) | Crude Cvg (%)             | Up (%) | Valid Cvg (%)             | Up (%) | Crude Cvg (%)             | Up (%) | Valid Cvg (%)             | Up (%) |
|                                                                                                                                                                          |                           | DPT1                      |        |                           |        | DPT2                      |        |                           |        | DPT3                      |        |                           |        | MCV1                      |        |                           |        |
| 1995                                                                                                                                                                     | <div><div></div></div> 62 | <div><div></div></div> 96 | 0      | <div><div></div></div> 59 | 1      | <div><div></div></div> 88 | 1      | <div><div></div></div> 55 | 3      | <div><div></div></div> 78 | 1      | <div><div></div></div> 40 | 10     | <div><div></div></div> 84 | 1      | <div><div></div></div> 5  | 3      |
| 2000                                                                                                                                                                     | <div><div></div></div> 75 | <div><div></div></div> 95 | 1      | <div><div></div></div> 72 | 2      | <div><div></div></div> 89 | 2      | <div><div></div></div> 67 | 4      | <div><div></div></div> 77 | 4      | <div><div></div></div> 54 | 13     | <div><div></div></div> 71 | 4      | <div><div></div></div> 44 | 7      |
| 2005                                                                                                                                                                     | <div><div></div></div> 78 | <div><div></div></div> 97 | 1      | <div><div></div></div> 77 | 1      | <div><div></div></div> 89 | 1      | <div><div></div></div> 74 | 2      | <div><div></div></div> 82 | 2      | <div><div></div></div> 61 | 10     | <div><div></div></div> 82 | 2      | <div><div></div></div> 50 | 7      |
| 2010                                                                                                                                                                     | <div><div></div></div> 83 | <div><div></div></div> 97 | 1      | <div><div></div></div> 77 | 1      | <div><div></div></div> 94 | 1      | <div><div></div></div> 75 | 2      | <div><div></div></div> 90 | 2      | <div><div></div></div> 65 | 9      | <div><div></div></div> 81 | 1      | <div><div></div></div> 59 | 3      |
|                                                                                                                                                                          |                           |                           |        |                           |        |                           |        |                           |        |                           |        |                           |        |                           |        |                           |        |
| Gold columns labeled 'Up (%)' show increase in crude or valid coverage if respondents with cards had received every eligible dose at every documented vaccination visit. |                           |                           |        |                           |        |                           |        |                           |        |                           |        |                           |        |                           |        |                           |        |
| Color bars are scaled so that 100% would fill the entire table cell.                                                                                                     |                           |                           |        |                           |        |                           |        |                           |        |                           |        |                           |        |                           |        |                           |        |
| All outcomes are weighted.                                                                                                                                               |                           |                           |        |                           |        |                           |        |                           |        |                           |        |                           |        |                           |        |                           |        |



**Table SN.5a. MOSV Consequences – Nigeria – Time to Correction – National Results**

| levelname    | BCG                 | DPT1               | DPT2               | DPT3               | MCV1                | OPV1               | OPV2                | OPV3                  |
|--------------|---------------------|--------------------|--------------------|--------------------|---------------------|--------------------|---------------------|-----------------------|
| Nigeria 1990 | 4   27   30   133   | 28   35   52   109 | 30   31   82   113 | 1   1   1   1      | 32   61   118   138 | 28   35   50   78  | 24   29   149   221 | 4   6   16   22       |
| Nigeria 1999 | 27   38   169   300 | 28   35   55   108 | 3   4   5   6      | 11   12   14   14  | 39   91   140   188 | 28   35   56   78  | 3   20   87   163   | 182   182   182   182 |
| Nigeria 2003 | 6   58   148   192  | 28   42   70   165 | 6   8   18   24    | 23   40   52   209 | 30   50   158   203 | 28   36   62   102 | 11   19   27   32   | 54   61   213   304   |
| Nigeria 2008 | 15   45   110   190 | 28   35   62   109 | 14   31   87   150 | 28   41   94   140 | 34   68   120   194 | 28   40   68   118 | 28   40   95   129  | 28   32   75   167    |
| Nigeria 2013 | 10   28   63   154  | 27   35   67   133 | 20   36   66   133 | 26   44   90   155 | 28   40   92   163  | 28   35   59   111 | 21   35   66   131  | 28   34   83   158    |
| Nigeria 2018 | 7   21   48   119   | 27   34   55   91  | 3   8   28   38    | 7   20   126   238 | 32   71   116   187 | 27   34   50   86  | 4   10   28   34    | 6   14   60   190     |

Table shows 25th, 50th, 75th, and 90th percentiles for days between first MOV and receiving dose, by level and dose.

**Table SN.5b. MOSV Consequences – Nigeria – Time to Correction – Subnational Detail**

| levelname  | BCG                  | DPT1               | DPT2                | DPT3                | MCV1                  | OPV1               | OPV2                | OPV3                  |
|------------|----------------------|--------------------|---------------------|---------------------|-----------------------|--------------------|---------------------|-----------------------|
| Centr 1999 | 30   104   187   220 | 31   37   49   61  | 2   2   2   2       | NA   NA   NA   NA   | 259   259   259   259 | 32   42   58   84  | NA   NA   NA   NA   | NA   NA   NA   NA     |
| North 1990 | 6   22   81   186    | 31   46   59   119 | 31   31   31   31   | NA   NA   NA   NA   | 38   63   113   129   | 30   42   52   63  | 24   29   149   221 | 6   6   6   6         |
| North 1999 | 16   31   61   79    | 18   30   33   44  | 3   3   3   3       | 15   15   15   15   | 91   138   142   170  | 22   44   67   78  | NA   NA   NA   NA   | NA   NA   NA   NA     |
| North 2003 | 7   32   148   164   | 28   42   77   198 | 13   18   23   26   | 24   32   42   49   | 30   50   105   193   | 26   42   62   113 | 3   3   3   3       | 61   61   61   61     |
| North 2008 | 28   63   135   229  | 28   42   76   161 | 26   36   88   147  | 28   35   64   124  | 34   63   110   157   | 28   42   76   159 | 28   35   92   133  | 31   46   118   198   |
| North 2013 | 17   42   77   176   | 25   33   68   147 | 28   43   82   143  | 28   42   68   159  | 25   40   102   181   | 28   35   65   132 | 19   42   87   135  | 27   28   60   153    |
| North 2018 | 7   28   58   128    | 28   35   56   90  | 4   12   28   35    | 8   14   154   365  | 30   63   115   188   | 28   35   56   88  | 4   10   27   44    | 6   10   42   254     |
| South 1990 | 15   27   28   28    | 28   35   48   91  | 56   82   108   124 | 1   1   1   1       | 30   60   117   139   | 28   35   50   99  | NA   NA   NA   NA   | 7   14   20   24      |
| South 1999 | 29   46   250   428  | 28   35   56   143 | 5   6   6   6       | 10   10   10   10   | 21   22   56   79     | 28   35   55   77  | 3   20   87   163   | 182   182   182   182 |
| South 2003 | 44   84   163   210  | 28   35   62   154 | 5   5   5   5       | 34   47   206   301 | 72   115   158   185  | 28   35   62   81  | 35   35   35   35   | 126   206   286   333 |
| South 2008 | 12   32   80   142   | 28   34   55   83  | 7   28   84   142   | 28   65   118   183 | 36   71   135   195   | 28   36   64   97  | 28   49   96   117  | 28   28   34   77     |
| South 2013 | 7   21   48   137    | 28   35   63   118 | 15   34   62   76   | 24   47   92   149  | 29   39   90   155    | 28   34   56   93  | 23   35   62   126  | 28   39   91   168    |
| South 2018 | 7   14   28   62     | 14   28   42   105 | 2   3   12   48     | 6   47   94   129   | 40   86   117   181   | 16   28   42   63  | 6   24   28   30    | 7   35   60   118     |

Table shows 25th, 50th, 75th, and 90th percentiles for days between first MOV and receiving dose, by level and dose.

**Table SC.5a. MOSV Consequences – Colombia – Potential Coverage Increase – National Results**

| levelname     | BCG                 | DPT1               | DPT2               | DPT3               | MCV                 | OPV1               | OPV2               | OPV3               |
|---------------|---------------------|--------------------|--------------------|--------------------|---------------------|--------------------|--------------------|--------------------|
| Colombia 1995 | 20   63   152   253 | 14   30   42   167 | 34   53   83   155 | 14   28   71   128 | 24   38   58   71   | 29   33   63   146 | 9   21   36   59   | 16   29   77   128 |
| Colombia 2000 | 10   36   103   181 | 10   35   70   132 | 16   40   80   163 | 20   47   86   181 | 60   98   170   187 | 13   41   70   130 | 12   30   63   141 | 22   40   98   168 |
| Colombia 2005 | 6   21   70   146   | 9   31   59   81   | 6   22   59   99   | 6   28   62   181  | 9   30   65   155   | 15   40   67   114 | 5   22   58   117  | 6   30   63   195  |
| Colombia 2010 | 4   26   61   103   | 8   32   61   96   | 3   7   31   55    | 6   30   66   178  | 22   39   100   191 | 10   33   61   86  | 1   5   27   39    | 10   30   64   178 |

Table shows 25th, 50th, 75th, and 90th percentiles for days between first MOV and receiving dose, by level and dose.

**Table SC.5b. MOSV Consequences – Colombia – Potential Coverage Increase – Subnational Detail**

| levelname                   | BCG                 | DPT1                | DPT2                | DPT3                  | MCV                   | OPV1                | OPV2               | OPV3                |
|-----------------------------|---------------------|---------------------|---------------------|-----------------------|-----------------------|---------------------|--------------------|---------------------|
| Atlántica 1995              | 26   72   150   195 | 20   30   61   206  | 72   93   114   127 | 8   29   62   146     | 24   24   24   24     | 28   33   59   151  | 10   15   68   100 | 27   38   102   143 |
| Atlántica 2000              | 7   30   134   213  | 9   29   59   81    | 3   19   43   61    | 6   17   58   74      | 64   74   174   176   | 9   42   78   104   | 6   18   70   161  | 7   20   59   107   |
| Atlántica 2005              | 7   30   82   164   | 15   30   54   81   | 12   30   72   117  | 6   28   62   153     | 7   30   65   158     | 22   45   66   101  | 4   22   70   136  | 6   24   93   228   |
| Atlántica 2010              | 7   26   50   102   | 6   35   56   62    | 8   20   34   82    | 18   34   119   153   | 19   34   69   141    | 6   31   56   62    | 3   4   28   36    | 16   32   90   185  |
| Bogotá 1995                 | 18   26   94   208  | 8   32   33   37    | 27   27   27   27   | 10   16   17   18     | NA   NA   NA   NA     | 32   38   70   90   | 6   6   16   23    | 10   16   17   18   |
| Bogotá 2000                 | 10   22   29   124  | 31   57   69   136  | 37   80   116   205 | 36   40   54   67     | 104   142   206   244 | 32   65   72   148  | 30   58   92   192 | 40   55   72   119  |
| Bogotá 2005                 | 6   8   9   10      | 8   29   31   58    | 4   6   17   36     | 19   30   46   56     | 25   92   160   173   | 15   28   30   30   | 4   6   14   28    | 4   8   19   26     |
| Bogotá 2010                 | 1   1   1   1       | 33   63   66   69   | NA   NA   NA   NA   | 245   245   245   245 | 133   158   182   197 | 63   63   63   63   | 1   1   1   1      | 10   10   10   10   |
| Central 1995                | 26   76   128   246 | 24   42   144   215 | 55   55   55   55   | 28   30   65   79     | 24   24   24   24     | 24   38   110   164 | 28   28   28   28  | 16   29   50   130  |
| Central 2000                | 13   37   88   219  | 10   33   103   154 | 21   38   64   128  | 32   56   129   164   | 86   134   181   187  | 10   36   66   137  | 18   33   62   119 | 34   63   126   178 |
| Central 2005                | 7   19   63   151   | 3   20   56   59    | 12   39   68   95   | 3   8   35   69       | 21   32   61   68     | 35   60   86   198  | 4   15   60   94   | 6   28   36   63    |
| Central 2010                | 6   40   68   167   | 25   61   90   262  | 2   4   6   8       | 8   30   42   144     | 28   69   110   182   | 25   32   61   64   | 2   6   14   26    | 4   9   40   175    |
| Oriental 1995               | 7   16   99   177   | 2   8   24   43     | 25   36   120   170 | NA   NA   NA   NA     | 51   51   51   51     | 24   35   46   52   | 12   14   25   32  | NA   NA   NA   NA   |
| Oriental 2000               | 13   40   103   160 | 9   38   56   82    | 15   29   80   156  | 24   47   85   173    | 50   96   134   176   | 10   36   66   90   | 13   26   62   132 | 15   31   116   145 |
| Oriental 2005               | 5   25   70   134   | 11   33   60   94   | 1   12   15   23    | 10   30   179   231   | 28   46   99   175    | 8   30   40   92    | 18   28   95   117 | 28   35   80   184  |
| Oriental 2010               | 1   4   55   135    | 20   30   49   84   | 6   22   58   215   | 1   6   53   138      | 4   31   120   160    | 30   58   62   62   | 2   6   14   22    | 4   48   61   160   |
| Pacífica 1995               | 36   52   176   252 | 25   30   32   67   | 66   66   66   66   | 20   68   114   122   | 80   80   80   80     | 30   31   88   122  | 42   48   55   58  | 53   72   91   102  |
| Pacífica 2000               | 17   58   85   128  | 20   43   80   122  | 30   76   152   197 | 57   92   184   272   | 35   68   114   156   | 32   55   78   150  | 12   19   38   60  | 32   84   136   180 |
| Pacífica 2005               | 5   28   80   148   | 25   40   63   116  | 5   22   59   111   | 10   30   49   89     | 6   26   34   50      | 34   62   70   122  | 14   38   53   67  | 9   30   69   174   |
| Pacífica 2010               | 4   22   58   111   | 12   38   59   71   | 7   10   28   35    | 2   9   10   49       | 22   31   53   115    | 6   15   38   63    | 5   18   37   42   | 20   36   51   57   |
| Territorios Nacionales 2005 | 4   11   33   76    | 5   31   48   62    | 10   20   30   113  | 6   43   86   117     | 6   16   64   94      | 6   30   60   93    | 3   15   38   88   | 6   9   51   107    |
| Territorios Nacionales 2010 | 8   30   63   84    | 7   30   61   89    | 1   1   4   16      | 11   58   113   174   | 31   58   198   230   | 4   32   76   111   | 1   2   10   161   | 39   79   120   150 |

Table shows 25th, 50th, 75th, and 90th percentiles for days between first MOV and receiving dose, by level and dose.
